# Supplementary material
Source: HighWire-hosted journal article supplement (https://cmajopen.ca/highwire/filestream/90098/field_highwire_adjunct_files/5/open-2022-0080-original-submission.pdf)
Supplement: open-2022-0080-original-submission.pdf [file open-2022-0080-original-submission.pdf]

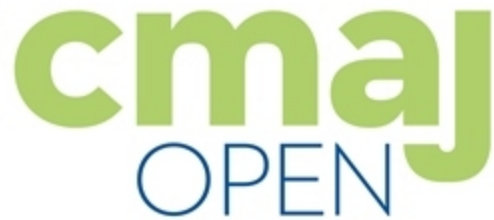

**When the exception becomes the norm: a mixed methods study on management of sleep disorder by family medicine preceptors**

|                               |                                                                                                                                                                                                                                                                                                                                                                                                                                                                                                                                                                                                                                                                                                                                                                                                                                                                                                                                                                                                                                                                                                                                                                                                                                                                                                               |
|-------------------------------|---------------------------------------------------------------------------------------------------------------------------------------------------------------------------------------------------------------------------------------------------------------------------------------------------------------------------------------------------------------------------------------------------------------------------------------------------------------------------------------------------------------------------------------------------------------------------------------------------------------------------------------------------------------------------------------------------------------------------------------------------------------------------------------------------------------------------------------------------------------------------------------------------------------------------------------------------------------------------------------------------------------------------------------------------------------------------------------------------------------------------------------------------------------------------------------------------------------------------------------------------------------------------------------------------------------|
| Journal:                      | <i>CMAJ Open</i>                                                                                                                                                                                                                                                                                                                                                                                                                                                                                                                                                                                                                                                                                                                                                                                                                                                                                                                                                                                                                                                                                                                                                                                                                                                                                              |
| Manuscript ID                 | CMAJOpen-2022-0080                                                                                                                                                                                                                                                                                                                                                                                                                                                                                                                                                                                                                                                                                                                                                                                                                                                                                                                                                                                                                                                                                                                                                                                                                                                                                            |
| Manuscript Type:              | Mixed methods                                                                                                                                                                                                                                                                                                                                                                                                                                                                                                                                                                                                                                                                                                                                                                                                                                                                                                                                                                                                                                                                                                                                                                                                                                                                                                 |
| Date Submitted by the Author: | 05-Apr-2022                                                                                                                                                                                                                                                                                                                                                                                                                                                                                                                                                                                                                                                                                                                                                                                                                                                                                                                                                                                                                                                                                                                                                                                                                                                                                                   |
| Complete List of Authors:     | Cheung, Sarah; University of Calgary, Department of Family Medicine<br>O'Beirne, Maeve; Univeristy of Calgary, Family Medicine<br>Hill, Todd; University of Calgary, Department of Family Medicine<br>Huyghebaert, Trudy; Alberta Health Services, Dept of Family Medicine,<br>Keller, Shelly; Calgary Foothills Primary Care Network, Dept of Family<br>Medicine<br>Kelly, Martina ; University of Calgary, Department of Family Medicine                                                                                                                                                                                                                                                                                                                                                                                                                                                                                                                                                                                                                                                                                                                                                                                                                                                                    |
| Keywords:                     | Drugs and therapeutics, Family medicine, general practice, primary care, Medical education, Qualitative research, Sleep                                                                                                                                                                                                                                                                                                                                                                                                                                                                                                                                                                                                                                                                                                                                                                                                                                                                                                                                                                                                                                                                                                                                                                                       |
| More Detailed Keywords:       | Sedative and hypnotics, Mixed methods                                                                                                                                                                                                                                                                                                                                                                                                                                                                                                                                                                                                                                                                                                                                                                                                                                                                                                                                                                                                                                                                                                                                                                                                                                                                         |
| Abstract:                     | <p><b>Background:</b><br/>Most prescriptions for sedative-hypnotics are written by family physicians yet little research examines how family physician residents learn to prescribe them. Given the influence of preceptors on resident prescribing, this study explored how family physician preceptors manage sleeping problems.</p> <p><b>Methods</b><br/>This mixed methods study included a quantitative survey of family physician preceptor attitudes to treatment options, perceptions of patient expectations and family physicians' self-efficacy beliefs, followed by qualitative semi-structured interviews, using case vignettes.<br/>Quantitative data were analyzed using descriptive statistics and qualitative interviews were analyzed using thematic analysis.</p> <p><b>Results</b><br/>Forty-seven preceptors affiliated with a postgraduate training program in Alberta completed the survey (47/76, 62%) and 10 were interviewed. Most respondents agreed they had sufficient expertise to use non-drug treatment (n=34, 72%). 43 (91%) had made efforts to reduce prescribing and 45 (96%) felt able to support patients empathically when not using sleeping medication. Qualitative data showed management of sleeping disorder was emotionally challenging. While participants</p> |

1  
2  
3  
4  
5  
6  
7  
8  
9  
10  
11  
12  
13  
14  
15  
16  
17  
18  
19  
20  
21  
22  
23  
24  
25  
26  
27  
28  
29  
30  
31  
32  
33  
34  
35  
36  
37  
38  
39  
40  
41  
42  
43  
44  
45  
46  
47  
48  
49  
50  
51  
52  
53  
54  
55  
56  
57  
58  
59  
60

|  |                                                                                                                                                                                                                                                                                                                                                                                                                                                                                                                                                                                                                                                                                      |
|--|--------------------------------------------------------------------------------------------------------------------------------------------------------------------------------------------------------------------------------------------------------------------------------------------------------------------------------------------------------------------------------------------------------------------------------------------------------------------------------------------------------------------------------------------------------------------------------------------------------------------------------------------------------------------------------------|
|  | <p>hesitated to prescribe sedatives, all reported 'exceptions' to prescribing, many of which included indications within guideline recommendations. Participants were reluctant to intervene with management plans of colleagues.</p> <p>Interpretation<br/>Preceptor participants were confident using non-pharmacological management, and hesitant to use sedative-hypnotics. Legitimate use of sedatives was presented as exceptional behaviour, but was consistent across participants, representing a social norm. Avoidant behaviour and failing to acknowledge emotional and social dimensions of prescribing, risks suppressing a more balanced approach to prescribing.</p> |
|  |                                                                                                                                                                                                                                                                                                                                                                                                                                                                                                                                                                                                                                                                                      |

SCHOLARONE™  
Manuscripts

## COREQ (COnsolidated criteria for REporting Qualitative research) Checklist

A checklist of items that should be included in reports of qualitative research. You must report the page number in your manuscript where you consider each of the items listed in this checklist. If you have not included this information, either revise your manuscript accordingly before submitting or note N/A.

| Topic                                          | Item No. | Guide Questions/Description                                                                                                                              | Reported on Page No. |
|------------------------------------------------|----------|----------------------------------------------------------------------------------------------------------------------------------------------------------|----------------------|
| <b>Domain 1: Research team and reflexivity</b> |          |                                                                                                                                                          |                      |
| <i>Personal characteristics</i>                |          |                                                                                                                                                          |                      |
| Interviewer/facilitator                        | 1        | Which author/s conducted the interview or focus group?                                                                                                   |                      |
| Credentials                                    | 2        | What were the researcher's credentials? E.g. PhD, MD                                                                                                     |                      |
| Occupation                                     | 3        | What was their occupation at the time of the study?                                                                                                      |                      |
| Gender                                         | 4        | Was the researcher male or female?                                                                                                                       |                      |
| Experience and training                        | 5        | What experience or training did the researcher have?                                                                                                     |                      |
| <i>Relationship with participants</i>          |          |                                                                                                                                                          |                      |
| Relationship established                       | 6        | Was a relationship established prior to study commencement?                                                                                              |                      |
| Participant knowledge of the interviewer       | 7        | What did the participants know about the researcher? e.g. personal goals, reasons for doing the research                                                 |                      |
| Interviewer characteristics                    | 8        | What characteristics were reported about the interviewer/facilitator? e.g. Bias, assumptions, reasons and interests in the research topic                |                      |
| <b>Domain 2: Study design</b>                  |          |                                                                                                                                                          |                      |
| <i>Theoretical framework</i>                   |          |                                                                                                                                                          |                      |
| Methodological orientation and Theory          | 9        | What methodological orientation was stated to underpin the study? e.g. grounded theory, discourse analysis, ethnography, phenomenology, content analysis |                      |
| <i>Participant selection</i>                   |          |                                                                                                                                                          |                      |
| Sampling                                       | 10       | How were participants selected? e.g. purposive, convenience, consecutive, snowball                                                                       |                      |
| Method of approach                             | 11       | How were participants approached? e.g. face-to-face, telephone, mail, email                                                                              |                      |
| Sample size                                    | 12       | How many participants were in the study?                                                                                                                 |                      |
| Non-participation                              | 13       | How many people refused to participate or dropped out? Reasons?                                                                                          |                      |
| <i>Setting</i>                                 |          |                                                                                                                                                          |                      |
| Setting of data collection                     | 14       | Where was the data collected? e.g. home, clinic, workplace                                                                                               |                      |
| Presence of non-participants                   | 15       | Was anyone else present besides the participants and researchers?                                                                                        |                      |
| Description of sample                          | 16       | What are the important characteristics of the sample? e.g. demographic data, date                                                                        |                      |
| <i>Data collection</i>                         |          |                                                                                                                                                          |                      |
| Interview guide                                | 17       | Were questions, prompts, guides provided by the authors? Was it pilot tested?                                                                            |                      |
| Repeat interviews                              | 18       | Were repeat interviews carried out? If yes, how many?                                                                                                    |                      |
| Audio/visual recording                         | 19       | Did the research use audio or visual recording to collect the data?                                                                                      |                      |
| Field notes                                    | 20       | Were field notes made during and/or after the interview or focus group?                                                                                  |                      |
| Duration                                       | 21       | What was the duration of the interviews or focus group?                                                                                                  |                      |
| Data saturation                                | 22       | Was data saturation discussed?                                                                                                                           |                      |
| Transcripts returned                           | 23       | Were transcripts returned to participants for comment and/or                                                                                             |                      |

| Topic                                  | Item No. | Guide Questions/Description                                                                                                        | Reported on Page No. |
|----------------------------------------|----------|------------------------------------------------------------------------------------------------------------------------------------|----------------------|
|                                        |          | correction?                                                                                                                        |                      |
| <b>Domain 3: analysis and findings</b> |          |                                                                                                                                    |                      |
| <i>Data analysis</i>                   |          |                                                                                                                                    |                      |
| Number of data coders                  | 24       | How many data coders coded the data?                                                                                               |                      |
| Description of the coding tree         | 25       | Did authors provide a description of the coding tree?                                                                              |                      |
| Derivation of themes                   | 26       | Were themes identified in advance or derived from the data?                                                                        |                      |
| Software                               | 27       | What software, if applicable, was used to manage the data?                                                                         |                      |
| Participant checking                   | 28       | Did participants provide feedback on the findings?                                                                                 |                      |
| <i>Reporting</i>                       |          |                                                                                                                                    |                      |
| Quotations presented                   | 29       | Were participant quotations presented to illustrate the themes/findings?<br>Was each quotation identified? e.g. participant number |                      |
| Data and findings consistent           | 30       | Was there consistency between the data presented and the findings?                                                                 |                      |
| Clarity of major themes                | 31       | Were major themes clearly presented in the findings?                                                                               |                      |
| Clarity of minor themes                | 32       | Is there a description of diverse cases or discussion of minor themes?                                                             |                      |

Developed from: Tong A, Sainsbury P, Craig J. Consolidated criteria for reporting qualitative research (COREQ): a 32-item checklist for interviews and focus groups. *International Journal for Quality in Health Care*. 2007. Volume 19, Number 6: pp. 349 – 357

**Once you have completed this checklist, please save a copy and upload it as part of your submission. DO NOT include this checklist as part of the main manuscript document. It must be uploaded as a separate file.**

# When the exception becomes the norm: a mixed methods study on management of sleep disorder by family medicine preceptors

## Abstract

### Background:

Most prescriptions for sedative-hypnotics are written by family physicians yet little research examines how family physician residents learn to prescribe them. Given the influence of preceptors on resident prescribing, this study explored how family physician preceptors manage sleeping problems.

### Methods

This mixed methods study included a quantitative survey of family physician preceptor attitudes to treatment options, perceptions of patient expectations and family physicians' self-efficacy beliefs, followed by qualitative semi-structured interviews, using case vignettes. Quantitative data were analyzed using descriptive statistics and qualitative interviews were analyzed using thematic analysis.

### Results

Forty-seven preceptors affiliated with a postgraduate training program in Alberta completed the survey (47/76, 62%) and 10 were interviewed. Most respondents agreed they had sufficient expertise to use non-drug treatment (n=34, 72%). 43 (91%) had made efforts to reduce prescribing and 45 (96%) felt able to support patients empathically when not using sleeping medication. Qualitative data showed management of sleeping disorder was emotionally challenging. While participants hesitated to prescribe sedatives, all reported 'exceptions' to

1  
2  
3 prescribing, many of which included indications within guideline recommendations. Participants  
4  
5 were reluctant to intervene with management plans of colleagues.  
6  
7  
8  
9

## 10 Interpretation

11  
12  
13 Preceptor participants were confident using non-pharmacological management, and hesitant to  
14  
15 use sedative-hypnotics. Legitimate use of sedatives was presented as exceptional behaviour, but  
16  
17 was consistent across participants, representing a social norm. Avoidant behaviour and failing to  
18  
19 acknowledge emotional and social dimensions of prescribing, risks suppressing a more balanced  
20  
21 approach to prescribing.  
22  
23  
24  
25  
26  
27  
28  
29  
30  
31  
32  
33  
34  
35  
36  
37  
38  
39  
40  
41  
42  
43  
44  
45  
46  
47  
48  
49  
50  
51  
52  
53  
54  
55  
56  
57  
58  
59  
60

## INTRODUCTION

Avoiding inappropriate use of sedative-hypnotics is a healthcare priority in Canada.<sup>1,2</sup> At any given time, it is estimated that approximately 12% of Canadians use sedatives, increasing to 16.5% of older adults.<sup>3</sup> Use of sedatives is associated with significant morbidity including falls, cognitive impairment, and health-care costs.<sup>4-6</sup>

Historical legacies of misuse and abuse of prescription medication, arising from lenient prescribing trends in the past,<sup>4,5,7</sup> stimulated development of a range of approaches to avoid and reduce inappropriate prescribing. Guidelines on the management of insomnia<sup>8,9</sup> emphasize risks associated with use of these medications, particularly risks of tolerance and dependence, and encourage physicians to use non-pharmacological approaches as first-line management.

Choosing Wisely, Canada<sup>1</sup> educates patients to understand sleeping pills are not the best option and Choosing Wisely messages are increasingly integrated into undergraduate<sup>10</sup> and postgraduate medical education.<sup>11</sup> In addition to promoting rational prescribing, physicians are encouraged to deprescribe sedative-hypnotics,<sup>12</sup> and actively review the need for medication, particularly in older patients. Several provinces implemented prescription monitoring programs, including BC (1993-1997), Ontario (2011-2013)<sup>4</sup> and Alberta<sup>13</sup> (2013<sup>14</sup>-present). Despite these efforts, the number the numbers of patients prescribed sleeping medication has remained relatively unchanged since 2013.<sup>3</sup>

One group of physicians with potential to reduce prescribing rates are family medicine residents. Each year, Canada graduates approximately 780 new family physicians.<sup>15</sup> Family physicians, as a group, are responsible for the initiation and maintenance of most community-based prescribing, including nursing homes and long-term care facilities, where sleeping medication is often prescribed. Family physician graduates also work as hospitalists, providing

1  
2  
3 care to relatively stable in-patients. Systematic reviews exploring management of sleep  
4 disorder<sup>16</sup> and use of sedative-hypnotics by family physicians,<sup>17</sup> indicate family physicians have  
5 ambivalent attitudes towards prescribing<sup>16–18</sup> sedative-hypnotics. Physician attitudes are  
6 important,<sup>19,20</sup> as they influence confidence towards management, the ability to empathically  
7 respond to patient requests and how physicians prescribe for different patient groups. Yet, how  
8 family physicians learn to prescribe is rarely mentioned, although the importance of role-  
9 modelling when learning to prescribe is recognised.<sup>21</sup> Development of medical learners’  
10 professional identities, including understandings of their professional norms, values and roles, is  
11 influenced by socialization through both formal and informal instruction,<sup>22,23</sup> such as occurs with  
12 role-models and mentors. The importance of how learning occurs in context, is widely  
13 recognized as significant in medical education.<sup>24,25</sup> This understanding draws from a social  
14 constructivist approach, in which learning and development are conceptualized as the  
15 transformation of socially shared activities into internalized processes.<sup>22,26</sup>

16  
17  
18  
19  
20  
21  
22  
23  
24  
25  
26  
27  
28  
29  
30  
31  
32  
33  
34  
35  
36  
37  
38  
39  
40  
41  
42  
43  
44  
45  
46  
47  
48  
49  
50  
51  
52  
53  
54  
55  
56  
57  
58  
59  
60

Given that most family resident training takes place in clinical practice, under the supervision of family medicine preceptors, the aim of this study was to develop an understanding of family physician preceptor attitudes towards and management of sleep disorder. Our research question was: *‘how do family physician preceptors manage sleep disorders in clinical practice?’*

## METHOD

### Study Setting

This study was set in the Family Medicine Residency program, Calgary, Alberta which provides clinical training for 70 family medicine residents each year. Supervision is provided by family



1  
2  
3 physician preceptors who work in academic teaching clinics (n=46) and community-based  
4  
5 family medicine clinics (n=30).  
6  
7  
8  
9

## 10 Study design

11  
12  
13 This is a mixed methods study, consisting of quantitative survey data and qualitative interviews.  
14  
15 Mixed methods designs build on the individual strengths of qualitative and quantitative data,  
16  
17 while supporting the contextualisation of findings to make them more useable for stakeholders.<sup>27</sup>  
18  
19 We used an explanatory sequential (two-phase) design<sup>28</sup> first collecting and analyzing  
20  
21 quantitative data, and then conducting interviews to help interpret the quantitative data and  
22  
23 explore the relationship between family physician attitudes and practices.  
24  
25  
26  
27  
28  
29

## 30 Research team

31  
32  
33 The research team consists of two academic family physicians (MK, MOB), two pharmacists  
34  
35 working in academic clinics (TH, SK), a psychologist (THill) and a PhD student (SC). MOB has  
36  
37 experience with quantitative data analysis and MK/TH/THill/SC have experience in the conduct  
38  
39 and analysis of qualitative data.  
40  
41  
42  
43

## 44 Data sources

45  
46  
47  
48 *Quantitative* A survey tool based on previous research<sup>19</sup> was designed, piloted with four family  
49  
50 physicians and modified. The final survey asked participant demographics, and a series of Likert  
51  
52 questions exploring family physician attitudes to treatment options (questions=5), family  
53  
54 physician's perceptions of patients (questions=2), family physician's self-efficacy beliefs  
55  
56  
57  
58  
59  
60

1  
2  
3 (questions=3) and prescribing self-efficacy (questions=4). A copy of the survey is available  
4  
5 (APPENDIX 1).  
6  
7  
8  
9

10 *Qualitative* To probe preceptor attitudes, we devised a semi-structured qualitative interview guide.

11  
12 This invited participants to outline their management in response to a series of vignettes. We  
13 developed vignettes to reflect common clinical scenarios, informed by the team's clinical  
14 experience and research literature which indicates physicians perceive some patients as more  
15 'deserving' of medication, while others are less likely to receive prescription.<sup>17,29</sup> Vignettes can  
16 be advantageous in qualitative research to tease out differences between responders' self-  
17 reported behaviour and their actual behaviour.<sup>30</sup> They offer participants distance and space to  
18 provide a discursive interpretation, and the situated context of a vignette can be used to explore  
19 the main influencing factors of an individual's decision or explanations.<sup>30</sup> A copy of the  
20 interview guide is available (APPENDIX 2).  
21  
22  
23  
24  
25  
26  
27  
28  
29  
30  
31  
32  
33  
34  
35  
36  
37  
38  
39  
40  
41  
42  
43  
44  
45  
46  
47  
48  
49  
50  
51  
52  
53  
54  
55  
56  
57  
58  
59  
60

### Recruitment & data collection

All family physician preceptors affiliated with the urban Family Medicine Residency Program, University of Calgary, Alberta, were eligible to participate (n=76). A letter outlining the study was emailed to preceptors by the residency program. Two reminders were sent at two weekly intervals. The letter included a consent form and a link to the survey. Following completion of the survey, respondents were asked if they were interested in participating in a qualitative interview. To incentivize response rates, survey participants were offered the opportunity to enter a draw for an Apple watch, while interviewees were offered \$100 to participate.

1  
2  
3 Survey data were collected in Jan – May 2021 and interviews were conducted between Jun – Oct  
4  
5 2021. Interviews were conducted by pharmacists TH and SK, who were known to some of the  
6  
7 participants as clinical team members. All participants who volunteered were interviewed  
8  
9 (convenience sampling). Interviews were conducted by Zoom, to accommodate public health  
10  
11 measures during COVID, at a time convenient to participants, audio recorded and transcribed  
12  
13 verbatim. Interviews lasted between 40-70 minutes and continued until we reached data  
14  
15 sufficiency.<sup>31</sup> Participant sociodemographic data was separated from interview data and  
16  
17 transcripts anonymized to protect participant identity, the identifying key devised and retained by  
18  
19 a member of administrative staff.  
20  
21  
22  
23  
24  
25

## 26 Analysis

27  
28  
29 Quantitative descriptive statistics were calculated for survey data and chi square testing  
30  
31 examined for difference in response with participant characteristics (gender, years in clinical  
32  
33 practice, site of clinic). Qualitative data were analyzed thematically<sup>32</sup> using NVivo 12 software.  
34  
35 Transcripts were read independently by MK and SC to identify preliminary codes. These were  
36  
37 then reviewed by the entire team and each team member independently applied initial codes to  
38  
39 two interview transcripts each. The team met to refine codes and an inductive codebook was  
40  
41 generated. SC and MK proceeded to code the entire dataset using a mix of deductive and  
42  
43 inductive coding. Analysis was reviewed and discussed with the larger team through a series of  
44  
45 team meetings.  
46  
47  
48  
49  
50  
51  
52  
53  
54  
55  
56  
57  
58  
59  
60

### *Data integration*

Survey findings were used to help interpret and deepen qualitative data analysis through discursive team meetings.

### Ethics

This study was approved by the Conjoint Health Research Ethics Board, University of Calgary.

### Results

#### Participants

Forty-seven preceptors completed the survey (47/76, 62%) and 10 family physicians were interviewed.

Overall, our sample contained more survey respondents (68%) and interviewees (80%) working in academic teaching clinics. Demographic characteristics of participants are available in Table 1.

#### Survey data

Survey results indicated practitioner confidence in managing sleep disorders using non-pharmacological approaches was generally high. Thirty-seven (79%) participants agreed treatment did not need to be supported with medication use and only 5 (11%) participants believed the advantages of sleep medication outweigh the disadvantages. Forty-two participants (89%) agreed management of sleep problems was within their remit. Most respondents agreed they had sufficient expertise to use non-drug treatment (72%) and did not feel overwhelmed managing patients with psychosocial problems (70%).

1  
2  
3 The results indicated widespread efforts to reduce prescribing of sleep medication (91%) with  
4 broad success (70%). Almost all respondents felt able to support patients empathetically (96%) when not  
5 prescribing sleep medication.  
6  
7

8  
9 Participants' perceptions of patients' expectations diverged. While 45% of participants responded  
10 neutrally to the statement that patients would be dissatisfied if they did not prescribe medication, 11  
12 (23%) agreed with this statement and 15 (32%) disagreed. Twenty respondents (43%) agreed that it was  
13 difficult for family physicians to motivate patients to choose non-medicine treatment, while 21 (45%)  
14 disagreed.  
15  
16

17  
18 Fewer men than women agreed with the statement 'the advantages of sleep medication outweigh  
19 the disadvantages' ( $p=0.015$ ) and the statement that 'there are no non-drug alternatives for sleep problems  
20 that are as effective as drugs' ( $p=0.046$ ). Physicians with <16 years of clinical practice were more likely  
21 to agree that they were trying to prescribe less sleeping medication without success, than those with fewer  
22 years of practice ( $p=0.023$ ).  
23  
24  
25  
26  
27  
28  
29  
30  
31  
32

### 33 Interview findings 34 35

36 We identified three overarching themes from interview data: preceptors' general approach to managing  
37 sleeping problems; preceptor hesitancy prescribing medication, which we termed 'sedative wariness' and  
38 preceptors' 'exceptions' to their general approach.  
39  
40  
41  
42  
43  
44  
45

#### 46 *1. General approach to sleep disorder – a symptom, not a diagnosis* 47 48

49 Sleeping problems were viewed as a complex presentation with a wide differential. History-taking was  
50 key and necessitated 'delving into the story behind the insomnia'. Practitioners described this process as  
51 exploring the 'bigger picture', to 'get a sense' of things, or looking 'in the background', as well as  
52 identifying patients' main concerns in relation to the impact of sleep difficulty and their expectations  
53  
54  
55  
56  
57  
58  
59  
60

1  
2  
3 around sleep. Participants emphasized the importance of acknowledging patients' distress. Treatment was  
4 described as challenging, necessitating a highly individualized approach to care. This, as noted by one  
5 participant, made prescribing decisions for sleep disorder different from other disorders such as, for  
6 example hypertension. Treatment was not considered 'black and white' but required comfort with  
7 uncertainty. They contrasted this approach with inflexible adherence to guidelines.  
8  
9  
10  
11  
12  
13  
14  
15

## 16 *2. Sedative wariness*

17  
18

19 Most participants promoted non-pharmacological approaches as first-line treatment, including sleep  
20 hygiene and cognitive-behavioural therapy for insomnia (CBT-I). Participants reported using a wide suite  
21 of educational resources, including customized patient information leaflets to support non-  
22 pharmacological management.  
23  
24  
25  
26  
27  
28  
29

30 Participants hesitated to initiate medication, while acknowledging they perceived patients often expected  
31 them to do so. They described their attitudes towards medication in affective terms; 'not loving' or  
32 'hating' sedatives. Only one participant openly acknowledged sedative prescribing, describing their  
33 approach as 'old school' in their openness to prescribe medication as a first-line treatment despite being  
34 aware of colleagues' hesitancy to prescribe them. There was an ethical dimension alongside the emotional  
35 one, whereby participants justified 'rule-breaking' as 'doing the right thing for the patient'.  
36  
37  
38  
39  
40  
41  
42  
43  
44  
45  
46

## 47 *3. When exceptions become the norm*

48  
49

50 While participants stated explicitly they aimed to use non-pharmacological management approaches and  
51 were wary of using medication, all admitted they did, at times, prescribe sedatives. These were presented  
52 as deviations from routine care, collectively termed 'valid exceptions'. 'Exceptions' were nevertheless,  
53  
54  
55  
56  
57  
58  
59  
60

1  
2  
3 consistent across interviewees. This included prescribing sedatives for short-term use or for patients  
4 presenting with acute grief or stress reactions, or in situations where the physician carefully balanced risks  
5 and harms, as part of harm reduction strategies. Physicians' descriptions of their prescribing in such  
6 situations was in keeping with guidelines, yet they presented this prescribing as concessionary and  
7 atypical, and expressed discomfort for 'breaking the rules'. Rather than rely on diagnostic criteria,  
8 physicians often justified these decisions based on experience and personal knowledge of the patient. A  
9 second 'exception' to sedative prescribing was consulting a colleague's patient. Participants hesitated to  
10 change a colleague's management. Management for this group of patients was presented as 'a bridge' or  
11 'band-aid' which could be uncomfortable.  
12  
13  
14  
15  
16  
17  
18  
19  
20  
21  
22  
23  
24

## 25 Synthesis of quantitative and qualitative results

26  
27  
28 Quantitative findings show family physician preceptors felt they had sufficient expertise to manage sleep  
29 disorder without medication, while expressing patient empathy, including when caring for patients with  
30 complex problems. Participants were mixed in their perception of patient expectation and how these were  
31 managed. Participants navigated patient expectations, adopting shared decision-making approaches, on a  
32 case-by-case basis. Physicians were hesitant to prescribe medication. All participants recognized  
33 medication could play a role, particularly in acute settings, but were hesitant to acknowledge this,  
34 describing prescribing in such situations as 'exceptions'. Participants were reluctant to intervene with  
35 management plans of colleagues.  
36  
37  
38  
39  
40  
41  
42  
43  
44  
45  
46  
47  
48  
49

## 50 Interpretation

51  
52  
53 Our findings indicate that family physician preceptors emphasized an approach to management which  
54 starts by understanding the problem; sleep disturbance was viewed as a symptom, not a diagnosis.  
55  
56  
57  
58  
59  
60

1  
2  
3 Preferred management involved patient education and non-pharmacological treatments such as sleep  
4 hygiene and CBT-I. Participants were hesitant to use medication, even when legitimately indicated, and  
5 they used holding strategies to manage patients of colleagues.  
6  
7  
8  
9

10  
11 To interpret our findings further, we reflected on the social history of sedative and hypnotic use. From  
12 widespread use in the 1980s, contemporary literature and policy emphasizes the risks inherent in use of  
13 this class of medications, with widespread focus on preventing or avoiding medication initiation and  
14 deprescribing.<sup>5,12</sup> Many such interventions focus on individual physician behaviour including, in some  
15 provinces such as Alberta, monitoring of individual prescribing rates.<sup>13</sup> Our data indicate that while  
16 physicians expressed self-efficacy in management as individuals, prescribing was also impacted by social  
17 norms. There was a shared understanding that prescribing was inherently something to be avoided,  
18 resulting in some emotional dissonance for participants as they attempted to practice patient-centred care.  
19 One possible interpretation of our data is that physicians have become avoidant of sedative-hypnotics,  
20 even in cases where they may have a potentially helpful role. This phenomenon has been suggested in the  
21 case of opioids.<sup>33,34</sup> Social ‘taboo’ around prescribing sedatives has been noted in one UK study that  
22 observed a reluctance on the part of older GPs to be interviewed on the topic, which the authors suggest  
23 ‘may reflect the blame, shame and lingering responsibility felt by longer-practising GPs’;<sup>29</sup> the study also  
24 found that current practitioners felt ‘a sense of responsibility for avoiding the risks associated with past  
25 benzodiazepine use’.<sup>29</sup> By blanketing all sedative-hypnotic use as harmful, patients may be denied  
26 medication which could ease distress in the acute setting<sup>35</sup> or off-set risks in situations of harm  
27 minimization. Indeed, given that sedative use is the norm, albeit selectively, failing to engage in open  
28 discussion about prescribing risks obfuscating inappropriate prescribing. Some participants adopted a  
29 ‘hard-line’ approach, indicating that avoidance of sedatives altogether was preferable, given their ‘taboo’  
30 status.  
31  
32  
33  
34  
35  
36  
37  
38  
39  
40  
41  
42  
43  
44  
45  
46  
47  
48  
49  
50  
51  
52  
53  
54  
55  
56  
57  
58  
59  
60



1  
2  
3 The problems from lack of dialogue over appropriate prescribing may also present in another way.  
4  
5 Several participants perceived patients as expecting medication and felt it was challenging to dissuade  
6  
7 patients from wanting medication. In contrast, research shows if patients are made aware of the risks, they  
8  
9 are open to alternative approaches particularly when providers are supportive.<sup>6,36</sup> One potential  
10  
11 explanation for anticipated difficulties was participants' recognition of the functional and mental impact  
12  
13 of sleep deprivation. The role of physician empathy in prescribing for sleep disorder is well  
14  
15 documented;<sup>15-17</sup> physicians recognize the 'misery'<sup>37</sup> of being unable to sleep and feel torn between  
16  
17 empathizing with a patient and promoting rationale prescribing. More open dialogue may thus in fact help  
18  
19 relieve some of the emotional burden or dissonance that practitioners may be experiencing.  
20  
21  
22  
23

24  
25 Balancing the risks and benefits of treatment while accounting for the patient's context is at the heart of  
26  
27 evidence-based medicine.<sup>38,39</sup> While our data suggests that is how family physician preceptors approach  
28  
29 the management of sleep disorder, there was also an unintended collusion of medication avoidance or  
30  
31 'turning a blind eye', expressed in emotional and moral terms. Several implications arise from our  
32  
33 findings. The practice of prescribing is generally presented as objective, in accordance with guidelines,  
34  
35 and independent of context. Our study suggests physician empathy is central to sedative prescribing.  
36  
37 Further research exploring the reasons and affective aspects of how physicians respond to patients'  
38  
39 circumstances,<sup>40</sup> by explicitly exploring 'prescribing dilemmas,' has potential to bridge the gap between  
40  
41 cognitive knowing and attitudes. Rather than dismissing emotions, discursive dialogue which  
42  
43 acknowledges affective issues, as in say reflective small groups, could enable a deeper sense of self-  
44  
45 efficacy, identified as foundational for prescribing.<sup>17,19</sup> This is important when considering training so that  
46  
47 young physicians do not replicate avoidant or 'band-aid' approaches to patient care.  
48  
49  
50  
51

52  
53 Another implication attends to the broader social context in which physician's find themselves  
54  
55 prescribing. Our study draws attention to the tensions between individual prescribing autonomy and  
56  
57 social prescribing norms for sedative-hypnotics. Social norms are powerful drivers of human behaviour;  
58  
59  
60

1  
2  
3 in relation to sedative-hypnotic use, there is an implicit corollary between being a good physician and  
4 avoiding sedative use. In our data, for some physicians, this social norm, as re-enforced by monitoring of  
5 prescribing<sup>41</sup> and censure of colleagues, resulted in prescribing wariness, or for some participants  
6 avoidance. Regrettably, this meant some patients, who could have benefitted from short-term use of  
7 medication, were denied treatment. A more balanced approach to prescribing could, we postulate,  
8 promote poised use, without the need to resort to exceptional pathways, which are in fact, *de rigueur* –  
9 where ‘rationale’ prescribing is no longer viewed as ‘irrational’ but legitimate. Future research could  
10 explore these possibilities in educational studies in family medicine residency programs.  
11  
12  
13  
14  
15  
16  
17  
18  
19  
20  
21

## 22 Limitations

23  
24  
25 This study has several limitations. The study is set in Calgary, Alberta, where many physicians practice a  
26 patient medical home model of care, with access to behavioural health consultants and CBT-I. Barriers to  
27 such care is often cited as a reason why physicians are more likely to prescribe medication.<sup>17</sup> Many of our  
28 participants worked in academic teaching clinics, which may not have similar time pressures to  
29 community practice. Our study would benefit from replication in other provinces, with broader  
30 community physician representation. Interviews were conducted by pharmacists known to participants,  
31 which may have led to social desirability in responses to interview questions, despite trying our mitigate  
32 technique of using vignettes.  
33  
34  
35  
36  
37  
38  
39  
40  
41  
42  
43  
44

## 45 Conclusion

46  
47  
48 Family physician preceptors are powerful role models, key influencers of tomorrow’s prescribers of  
49 sedative-hypnotics. Teaching physicians were overall confident in their use of non-pharmacological  
50 management, adopting evidence-based approaches as first-line. In the majority, they were hesitant to use  
51 sedative-hypnotics. Legitimate use of sedatives was presented as exceptional behaviour, when in fact it  
52  
53  
54  
55  
56  
57  
58  
59  
60

1  
2  
3 was the norm across participants. Interventions targeting individual physician attitudes, complemented by  
4  
5 a balanced approach to permitted use of medication, could result in more open discussion on the use of  
6  
7 this group of medication. In this way, fundamental challenges of sedative prescribing, which are  
8  
9 emotional and social, rather than logarithm decisions, can be addressed rather than avoided.  
10  
11  
12  
13  
14  
15  
16  
17  
18  
19  
20  
21  
22  
23  
24  
25  
26  
27  
28  
29  
30  
31  
32  
33  
34  
35  
36  
37  
38  
39  
40  
41  
42  
43  
44  
45  
46  
47  
48  
49  
50  
51  
52  
53  
54  
55  
56  
57  
58  
59  
60

Confidential

## References

1. For B. Insomnia and Anxiety in Older People : Sleeping pills are usually not the best solution. Available from: <https://choosingwiselycanada.org/sleeping-pills-and-older-adults/>. (accessed 2022 Jan 31).
2. Farrell B, Tsang C, Raman-Wilms L, Irving H, Conklin J, Pottie K. What are priorities for deprescribing for elderly patients? Capturing the voice of practitioners: A modified dephi process. *PLoS ONE*. 2015;10(4):e012246. Available from: <https://doi.org/10.1371/journal.pone.0122246>.
3. Canadian Centre on Substance Use and Addiction. Canadian Drug Summary: Cannabis. *Canadian Centre on Substance Use and Addiction*. 2019. Available from: <https://www.ccsa.ca/sites/default/files/2019-06/CCSA-Canadian-Drug-Summary-Sedatives-2019-en.pdf>. (accessed 2022 Jan 31).
4. Murphy Y, Wilson E, Goldner EME, Fischer B, Benedikt F. Benzodiazepine Use, Misuse, and Harm at the Population Level in Canada: A Comprehensive Narrative Review of Data and Developments Since 1995. *Clin Drug Investig*. 2016;36(7):519–30. Available from: <https://doi.org/10.1007/s40261-016-0397-8>.
5. Votaw VRV, Geyer R, Rieselbach MMM, McHugh RKR. The epidemiology of benzodiazepine misuse: A systematic review. *Drug Alcohol Depend*. 2019;(200):95–114. Available from: <https://doi.org/10.1016/j.drugalcdep.2019.02.033>.
6. Schmitz A. Benzodiazepines: the time for systematic change is now. *Addiction*. 2021;116(2):219–21. Available from: <https://doi.org/10.1111/add.15095>.
7. Busto U, Lanctôt K, Isaac P, Adrian M. Benzodiazepine use and abuse in Canada. *CMAJ*. 1989;141(9):917–21. Available from: <https://www.cmaj.ca/content/141/9/917>.
8. Toward Optimized Practice (TOP). Assessment to Management of Adult Insomnia. *Clin Pract Guidel*. 2015. Available from: <https://actt.albertadoctors.org/CPGs/Lists/CPGDocumentList/Adult-Insomnia-CPG.pdf>. (accessed

- 2022 Jan 31).
9. Qaseem A, Kansagara D, Forcica MA, Cooke M, Denberg TDT, Barry MJ, et al. Management of Chronic Insomnia Disorder in Adults: A Clinical Practice Guideline From the American College of Physicians. *Ann Intern Med.* 2016;165(2):125–33. Available from: <https://doi.org/10.7326/M15-2175>.
  10. Choosing Wisely Canada. Students and Trainees Advocating for Resource Stewardship (STARS). Available from: <https://choosingwiselycanada.org/campaign/stars/>. (accessed 2022 Jan 31).
  11. Royal College of Physicians and Surgeons of Canada. CanMEDS Resource Stewardship Curriculum Toolkit Series. Available from: <https://www.royalcollege.ca/rcsite/canmeds/resource-stewardship-e>. (accessed 2022 Jan 31).
  12. Pottie K, Thompson W, Davies S, Grenier J, Sadowski CA, Welch V, et al. Deprescribing benzodiazepine receptor agonists: Evidence-based clinical practice guideline. *Can Fam Physician.* 2018;64(5):339–51. Available from: <http://www.ncbi.nlm.nih.gov/pmc/articles/pmc5951648/>.
  13. College of Physicians and Surgeons of Alberta. Prescribing: Drugs Associated with Substance Use Disorders or Substance-Related Harm. 2019. Available from: [https://cpsa.ca/wp-content/uploads/2020/06/AP\\_Prescribing-Drugs-Associated-with-Substance-Use-Disorders.pdf](https://cpsa.ca/wp-content/uploads/2020/06/AP_Prescribing-Drugs-Associated-with-Substance-Use-Disorders.pdf). (accessed 2022 Jan 31).
  14. Furlan A, MacDougall P, Pellerin D, Shaw K, Spitzig D, Wilson G, et al. Overview of four prescription monitoring/review programs in Canada. *Pain Res Manag.* 2014;19(2):102–6.
  15. CaRMS. Program Descriptions - First Iteration. 2022.
  16. Araújo T, Jarrin D, Leanza Y, Vallières A, Morin C. Qualitative studies of insomnia: Current state of knowledge in the field. *Sleep Med Rev.* 2017;31:58–69. Available from: <https://doi.org/10.1016/j.smrv.2016.01.003>.
  17. Sirdifield C, Anthierens S, Creupelandt H, Chipchase SSY, Christiaens T, Siriwardena ANA. General practitioners' experiences and perceptions of benzodiazepine prescribing: systematic review and meta-synthesis. *BMC Fam Pract.* 2013;14:191. Available from:

- 1  
2  
3 <https://dx.doi.org/10.1186%2F1471-2296-14-191>.
- 4  
5 18. Davy Z, Middlemass J, Siriwardena AAN. Patients' and clinicians' experiences and perceptions of  
6 the primary care management of insomnia: qualitative study. *Health Expect*. 2015;18(5):1371–83.  
7 Available from: <https://doi.org/10.1111/hex.12119>.
- 8  
9  
10  
11 19. Creupelandt H, Anthierens S, Habraken H, Declercq T, Sirdifield C, Siriwardena ANA, et al.  
12 Teaching young GPs to cope with psychosocial consultations without prescribing: a durable  
13 impact of an e-module on determinants of benzodiazepines prescribing. *BMC Med Educ*.  
14 2017;17(1):259. Available from: <https://dx.doi.org/10.1186%2Fs12909-017-1100-3>.
- 15  
16  
17  
18 20. Anderson K, Stowasser D, Freeman C, Scott I. Prescriber barriers and enablers to minimising  
19 potentially inappropriate medications in adults: a systematic review and thematic synthesis. *BMJ*  
20 *Open*. 2014;4(12):e006544. Available from: <https://doi.org/10.1136/bmjopen-2014-006544>.
- 21  
22  
23  
24 21. Kelly M, Dornan T, Pringsheim T. The lesser of two evils: a qualitative study of quetiapine  
25 prescribing by family physicians. *CMAJOpen*. 2018;6(2):E191–6. Available from:  
26 <https://doi.org/10.9778/cmajo.20170145>.
- 27  
28  
29  
30 22. Goldie J. The formation of professional identity in medical students: Considerations for educators.  
31 *Med Teach*. 2012;34(9). Available from: <https://doi.org/10.3109/0142159X.2012.687476>.
- 32  
33  
34  
35 23. Cruess RLR, Cruess SSR, Boudreau JD, Snell L, Steinert Y. A schematic representation of the  
36 professional identity formation and socialization of medical students and residents: A guide for  
37 medical educators. *Acad Med*. 2015;90(6):718–25. Available from:  
38 <https://doi.org/ACM.0000000000000700>.
- 39  
40  
41  
42 24. Dennick R. Constructivism: reflections on twenty-five years teaching the constructivist approach  
43 in medical education. *Int J Med Educ*. 2016;(7):200–5. Available from:  
44 <https://doi.org/10.5116/ijme.5763.de11>.
- 45  
46  
47  
48 25. Kaufman DM, Mann K. Teaching and Learning in Medical Education. In: Swanwick T, editor.  
49 *Understanding Medical Education*. The Association for the Study of Medical Education; 2013. p.  
50 7–29. Available from: <https://doi.org/10.1002/9781444320282.ch2>.
- 51  
52  
53  
54  
55  
56  
57  
58  
59  
60

- 1  
2  
3 26. John-Steiner V, Mahn H. Sociocultural approaches to learning and development: A Vygotskian  
4 framework. *Educ Psychol*. 1996;31(3-4):191-206. Available from:  
5  
6 <https://doi.org/10.1080/00461520.1996.9653266>.  
7  
8  
9 27. Bowers B, Cohen LLW, Elliot AEA, Grabowski DCD, Fishman NWN, Sharkey SSS, et al.  
10 Creating and supporting a mixed methods health services research team. *Health Serv Res*.  
11 2013;48(6 PART2):2157-80. Available from: <https://doi.org/10.1111/1475-6773.12118>.  
12  
13  
14 28. Creswell J. Qualitative, quantitative, and mixed methods approaches. In: *Research Design*.  
15 Thousand Oaks, CA: SAGE Publications, Inc; 2013. p. 1-26.  
16  
17  
18 29. Rogers A, Pilgrim D, Brennan S, Sulaiman I, Watson G, Chew-Graham C. Prescribing  
19 benzodiazepines in general practice: a new view of an old problem. *Health*. 2007;11(2):181-98.  
20 Available from: <https://doi.org/10.1177/1363459307074693>.  
21  
22  
23 30. Finch J. The vignette technique in survey research. *Sociology*. 1987;21(1):105-14. Available  
24 from: <https://doi.org/10.1177/0038038587021001008>.  
25  
26  
27 31. Varpio L, Ajjawi R, Monrouxe LL V., O'Brien BCB, Rees CCE. Shedding the cobra effect:  
28 Problematising thematic emergence, triangulation, saturation and member checking. *Med Educ*.  
29 2017;51(1):40-50. Available from: <https://doi.org/10.1111/medu.13124>.  
30  
31  
32 32. Braun V, Clarke V. Thematic analysis: A practical guide. Thousand Oaks: SAGE Publications  
33 Inc.; 2021. 376 p.  
34  
35  
36 33. Owens B. Opioid prescriptions down but some patients fear doctors now too strict. *CMAJ*.  
37 2019;191(19):E546-7. Available from: <https://doi.org/10.1503/cmaj.109-5748>.  
38  
39  
40 34. Moldovan B. "Opiophobia" Past and Present. *Pract Pain Manag*. 2005;5(1). Available from:  
41 [https://www.practicalpainmanagement.com/treatments/pharmacological/opioids/opiophobia-past-](https://www.practicalpainmanagement.com/treatments/pharmacological/opioids/opiophobia-past-present)  
42 present.  
43  
44  
45 35. Baldwin DS, Aitchison K, Bateson A, Curran HV, Davies S, Leonard B, et al. Benzodiazepines:  
46 Risks and benefits. A reconsideration. *Journal of Psychopharmacology*. 2013;27(11):967-71.  
47 Available from: <https://doi.org/10.1177/0269881113503509>.  
48  
49  
50  
51  
52  
53  
54  
55  
56  
57  
58  
59  
60

- 1  
2  
3 36. Martin P, Tannenbaum C. A realist evaluation of patients' decisions to deprescribe in the  
4 EMPOWER trial. *BMJ Open*. 2017;7(4):e:015959. Available from:  
5  
6  
7 <https://doi.org/10.1136/bmjopen-2017-015959>.  
8
- 9 37. Moloney M. "Sometimes, it's easier to write the prescription": physician and patient accounts of  
10 the reluctant medicalisation of sleeplessness. *Sociol Health Illn*. 2017;39(3):333–48. Available  
11 from: <https://doi.org/10.1111/1467-9566.12485>.  
12  
13  
14
- 15 38. Sackett D, Rosenberg W, Gray J, Haynes R, Richardson W. Evidence based medicine: what it is  
16 and what it isn't. *BMJ*. 1996;312–71. Available from: <https://doi.org/10.1136/bmj.312.7023.71>.  
17  
18  
19
- 20 39. Brives C, Le Marcis F, Sanabria E. What's in a Context? Tenses and Tensions in Evidence-Based  
21 Medicine. *Med Anthropol*. 2016;35(5):369–76. Available from:  
22 <https://doi.org/10.1080/01459740.2016.1160089>.  
23  
24  
25
- 26 40. Mercuri M, Sherbino J, Sedran R, Frank J, Gafni A, Norman G. When guidelines don't guide: the  
27 effect of patient context on management decisions based on clinical practice guidelines. *Acad*  
28 *Med*. 2015;90(2):191–6. Available from: <https://doi.org/10.1097/ACM.0000000000000542>.  
29  
30  
31
- 32 41. Dybwad T, Kjølørød L, Eskerud J, Laerum E. Why are some doctors high-prescribers of  
33 benzodiazepines and minor opiates? A qualitative study of GPs in Norway. *Fam Pract*.  
34 1997;14(5):361–8. Available from: <https://doi.org/10.1093/fampra/14.5.361>.  
35  
36  
37  
38  
39  
40  
41  
42  
43  
44  
45  
46  
47  
48  
49  
50  
51  
52  
53  
54  
55  
56  
57  
58  
59  
60



**Table 1.** Demographic characteristics of participants

| <b>Variables</b>                  | <b>Survey<br/>n (%)<br/>total n=47</b> | <b>Interviews<br/>n (%)<br/>total n=10</b> |
|-----------------------------------|----------------------------------------|--------------------------------------------|
| <b>Sex</b>                        |                                        |                                            |
| Male                              | 19 (44.19)                             | 4 (40)                                     |
| Female                            | 24 (55.81)                             | 6 (60)                                     |
| Non-binary                        | 1                                      |                                            |
| <b>Years in Clinical Practice</b> |                                        |                                            |
| < 5 years                         | 3 (6.38)                               | 1                                          |
| 6 - 15 years                      | 19 (40.43)                             | 6                                          |
| > 16 years                        | 25 (53.19)                             | 3                                          |
| <b>Types of Clinic</b>            |                                        |                                            |
| Community Clinic                  | 15 (31.91)                             | 2 (20)                                     |
| Academic Teaching Sites           | 32 (68.09)                             | 8 (80)                                     |

| Subscale                                              | Question anchor                                                                                                    | Strongly Disagree n (%) | Disagree n (%) | Neutral n (%) | Agree n (%)   | Strongly Agree n (%) |
|-------------------------------------------------------|--------------------------------------------------------------------------------------------------------------------|-------------------------|----------------|---------------|---------------|----------------------|
| <b>Family physician attitude to treatment options</b> | 1.The advantages of sleep medication outweigh the disadvantages *                                                  | 10<br>(21.28)           | 19<br>(40.43)  | 13<br>(27.66) | 5<br>(10.64)  | 0                    |
|                                                       | 2.There are no non-drug alternatives for sleep problems that are as effective as drugs**                           | 25<br>(53.19)           | 12<br>(25.53)  | 4<br>(8.51)   | 3<br>(6.38)   | 3<br>(6.38)          |
|                                                       | 3.I don't have time to treat sleep problems using non-drug therapies                                               | 10<br>(21.28)           | 24<br>(51.06)  | 8<br>(17.02)  | 3<br>(6.38)   | 2<br>(4.26)          |
|                                                       | 4.Non-medicine treatment of sleep problems is the business of other professionals                                  | 21<br>(44.68)           | 21<br>(44.68)  | 3<br>(6.38)   | 1<br>(2.13)   | 1<br>(2.13)          |
|                                                       | 5.Non-drug treatment of sleep problems needs to be supported with medication                                       | 12<br>(25.53)           | 25<br>(53.19)  | 10<br>(21.28) | 0             | 0                    |
| <b>Family physician perception of the patient</b>     | 6.If I do not prescribe a medication to a patient with sleep problems s/he is dissatisfied                         | 3<br>(6.38)             | 12<br>(25.53)  | 21<br>(44.68) | 10<br>(21.28) | 1<br>(2.13)          |
|                                                       | 7.It is difficult for a family doctor to motivate a patient with sleep problems to choose a non-medicine treatment | 3<br>(6.38)             | 18<br>(38.30)  | 6<br>(12.77)  | 16<br>(34.04) | 4<br>(8.51)          |
| <b>Family physician self-efficacy beliefs</b>         | 8.When I am not prescribing medication for sleep problems I feel like I am not empathic                            | 17<br>(36.17)           | 28<br>(59.57)  | 1<br>(2.13)   | 0             | 1<br>(2.13)          |
|                                                       | 9.I have the expertise to use non-drug treatment for sleep problems                                                | 0                       | 5<br>(10.64)   | 8<br>(17.02)  | 27<br>(57.45) | 7<br>(14.89)         |
|                                                       | 10.I often feel overwhelmed when a patient presents with psychosocial problems                                     | 8<br>(17.02)            | 25<br>(53.19)  | 9<br>(19.15)  | 5<br>(10.64)  | 0                    |
| <b>Prescribing self-efficacy</b>                      | 11.I have tried in the past to prescribe less sleep medication                                                     | 1<br>(2.13)             | 0              | 3<br>(6.38)   | 25<br>(53.19) | 18<br>(38.30)        |
|                                                       | 12.I intend to prescribe less sleep medication but don't know how                                                  | 5<br>(10.64)            | 23<br>(48.94)  | 13<br>(27.66) | 6<br>(12.77)  | 0                    |
|                                                       | 13.I am trying at the moment to prescribe less sleep medication but without success***                             | 8<br>(17.02)            | 27<br>(57.45)  | 7<br>(14.89)  | 4<br>(8.51)   | 1<br>(2.13)          |
|                                                       | 14.I am trying at the moment to prescribe less sleep medication and have succeeded in doing so                     | 0                       | 2<br>(4.26)    | 12<br>(25.53) | 27<br>(57.45) | 6<br>(12.77)         |

\*p=0.015, female to male; \*\*p=0.046, female to male, \*\*\*p=0.023, physicians > 16 years in practice

**Table 3: Qualitative analysis of family physician preceptors' management of sleeping problems**

| Theme                              | Subtheme                                                  | Illustrative quote                                                                                                                                                                                                                                                                                                                                                                                                                                                                                                                                                                            |
|------------------------------------|-----------------------------------------------------------|-----------------------------------------------------------------------------------------------------------------------------------------------------------------------------------------------------------------------------------------------------------------------------------------------------------------------------------------------------------------------------------------------------------------------------------------------------------------------------------------------------------------------------------------------------------------------------------------------|
| General approach to sleep disorder | Sleeping problems are a symptom, not a diagnosis          | <p>I would want to really flesh that out first. So, asking sort of why is it that you're not sleeping and what's going through your mind when you're laying down, and I would suspect that that would unearth quite a bit of kind of emotional baggage and, you know, grief, maybe depression. (Participant 4)</p> <p>Explore kind of those bigger picture things, and just try to really get a sense of this patient's context. (Participant 6)</p> <p>Look at all the other factors that might be affecting this person..... You know, who knows what else is going on? (Participant 8)</p> |
|                                    | Acknowledging patient distress                            | <p>Sleep is an emotional discussion, right? Like, people get very upset about the lack of sleep, or perceived poor sleep. [Patients] who are not getting sleep lose the ability to be perfectly rational. (Participant 3)</p> <p>You need to balance compassion for the patient's experience, much like, I think, you know, depression or anxiety. It's – it affects different people in different ways. And so, you can never really assume how debilitating someone's – or bothersome someone's insomnia is. (Participant 4)</p>                                                            |
|                                    | Individualising care – balancing risks and breaking rules | <p>Insomnia treatment ...is very challenging...you need to balance compassion for the patient's experience...But that needs to be balanced with the fact that a ....lot of the most common treatments that people have been</p>                                                                                                                                                                                                                                                                                                                                                               |

1  
2  
3  
4  
5  
6  
7  
8  
9  
10  
11  
12  
13  
14  
15  
16  
17  
18  
19  
20  
21  
22  
23  
24  
25  
26  
27  
28  
29  
30  
31  
32  
33  
34  
35  
36  
37  
38  
39  
40  
41  
42  
43  
44  
45  
46  
47

|                   |                                  |                                                                                                                                                                                                                                                                                                                                                                                                                                                                                                                                                                                                                                                                                                                                                                                                                            |
|-------------------|----------------------------------|----------------------------------------------------------------------------------------------------------------------------------------------------------------------------------------------------------------------------------------------------------------------------------------------------------------------------------------------------------------------------------------------------------------------------------------------------------------------------------------------------------------------------------------------------------------------------------------------------------------------------------------------------------------------------------------------------------------------------------------------------------------------------------------------------------------------------|
|                   |                                  | <p>on or exposed to or heard about are quite dangerous or risky when misused. (Participant 4)</p> <p>It's very dissimilar to the approach to a lot of other meds, you know. Like managing asthma.... It's individual medicine it doesn't follow guidelines. It's like you're breaking rules so that you can actually do what's right.... There's as many ways to manage substance use and sleep and pain as there are people who have those problems. [...] and you really have to do it differently every time. (Participant 2)</p> <p>I don't have a sort of formula for it. (Participant 7)</p> <p>It's a very situational kind of thing. (Participant 8)</p> <p>You have to be really comfortable with uncertainty. .... It's like you're breaking rules so that you can actually do what's right. (Participant 2)</p> |
| Sedative wariness | Non-drug treatment as first-line | <p>I try to avoid medication wherever possible or at least build it into a more comprehensive plan (Participant 4)</p> <p>So, I try to focus first on non-pharmacological interventions whenever possible, whether that's you know is it organic or not organic. (Participant 2)</p>                                                                                                                                                                                                                                                                                                                                                                                                                                                                                                                                       |
|                   | Medication hesitancy             | <p>I'm not a huge one in favour of medications. I don't believe in medications. If we do use them, try not to use the benzos, use the tricyclic or something else, depending on the patient, whether it's safe or not. (Participant 8)</p>                                                                                                                                                                                                                                                                                                                                                                                                                                                                                                                                                                                 |

1  
2  
3  
4  
5  
6  
7  
8  
9  
10  
11  
12  
13  
14  
15  
16  
17  
18  
19  
20  
21  
22  
23  
24  
25  
26  
27  
28  
29  
30  
31  
32  
33  
34  
35  
36  
37  
38  
39  
40  
41  
42  
43  
44  
45  
46  
47

|  |  |                                                                                                                                                                                                                                                                                                                                                                                                                                                                                                                                                                                                                                                                                                                                                                                                                                                                                                                                                                                                                                                                                                                                                                                                                                                                                                                                                                          |
|--|--|--------------------------------------------------------------------------------------------------------------------------------------------------------------------------------------------------------------------------------------------------------------------------------------------------------------------------------------------------------------------------------------------------------------------------------------------------------------------------------------------------------------------------------------------------------------------------------------------------------------------------------------------------------------------------------------------------------------------------------------------------------------------------------------------------------------------------------------------------------------------------------------------------------------------------------------------------------------------------------------------------------------------------------------------------------------------------------------------------------------------------------------------------------------------------------------------------------------------------------------------------------------------------------------------------------------------------------------------------------------------------|
|  |  | <p>I'm not a huge fan of Zopiclone. But ....I might use, I might use Zopiclone. And why? Just because it's super short-term, you know. , I don't love the Benzo's. I certainly don't want them to take Graval. Because we just know it doesn't benefit the sleep cycle. You know, it makes things worse. I think Benzo, is similar to treating your sleep with booze, which many people do. You know and get sleepy with booze, but then it wrecks the sleep cycle. So then over time they get more tired and over time they may get more depressed. (Participant 1)</p> <p>There's a lot of fear. There's a lot of fear that you're going to harm the patient. There's a lot of fear that if you prescribe like this as an attending the College is going to come after you. (Participant 2)</p> <p>So Z-drugs, I use very, very sparingly – very, very sparingly. (Participant 9)</p> <p>I am slightly – I call it crazy – I hate [Z]-drugs, and usually when patients talk to me about insomnia, they want a Z-drug.... I'm very hesitant about it. ... I think all of these drugs to treat insomnia sometimes mask the problem. (Participant 3)</p> <p>I also try and get them to not jump to medication as kind of a first line. And if they're going to take kind of a medication route, to just be aware of the breadth of different options. (Participant 4)</p> |
|--|--|--------------------------------------------------------------------------------------------------------------------------------------------------------------------------------------------------------------------------------------------------------------------------------------------------------------------------------------------------------------------------------------------------------------------------------------------------------------------------------------------------------------------------------------------------------------------------------------------------------------------------------------------------------------------------------------------------------------------------------------------------------------------------------------------------------------------------------------------------------------------------------------------------------------------------------------------------------------------------------------------------------------------------------------------------------------------------------------------------------------------------------------------------------------------------------------------------------------------------------------------------------------------------------------------------------------------------------------------------------------------------|

1  
2  
3  
4  
5  
6  
7  
8  
9  
10  
11  
12  
13  
14  
15  
16  
17  
18  
19  
20  
21  
22  
23  
24  
25  
26  
27  
28  
29  
30  
31  
32  
33  
34  
35  
36  
37  
38  
39  
40  
41  
42  
43  
44  
45  
46  
47

|                                 |                                             |                                                                                                                                                                                                                                                                                                                                                                                                                                                                                                                                                                                                                                                                                                                                  |
|---------------------------------|---------------------------------------------|----------------------------------------------------------------------------------------------------------------------------------------------------------------------------------------------------------------------------------------------------------------------------------------------------------------------------------------------------------------------------------------------------------------------------------------------------------------------------------------------------------------------------------------------------------------------------------------------------------------------------------------------------------------------------------------------------------------------------------|
|                                 |                                             | Benzos seem to be pretty taboo right now. Or like in the past few years, they've really gotten a really bad rap. (Participant 10)                                                                                                                                                                                                                                                                                                                                                                                                                                                                                                                                                                                                |
| When exceptions become the norm | The exceptional indication                  | <p>So, there are definitely significant exceptions regarding Z-drugs, I have easily, like, five patients I can think of that I do prescribe without question for.....There are totally reasonable exceptions, but I won't understand if a person meets my reasonable expectation or exception criteria if I don't have this conversation with them. So, you know, with an acute stressor like this, I think that we had come up with this a little bit in, like, talking about some of my past examples, I automatically see a lane into my exception pathway. (Participant 3)</p> <p>I feel comfortable in choosing patients that I'm going to be able to get off of them once we get them through whatever (Participant 2)</p> |
|                                 | Prescribing for another physicians' patient | <p>You can't step into another provider's shoes and expect to change, you know, a multi-decade treatment plan over the course of a week. (Participant 4)</p> <p>How do you manage a treatment plan that you maybe don't personally agree with, but that has been initiated by another prescriber? And so, the idea of sort of immediate patient safety being a number one consideration and then not trying to kind of go off and do your own thing, but involve, you know, their provider in whatever you want to do or whatever you think needs to be done as a long-term plan. (Participant 4)</p>                                                                                                                            |

1  
2  
3  
4  
5  
6  
7  
8  
9  
10  
11  
12  
13  
14  
15  
16  
17  
18  
19  
20  
21  
22  
23  
24  
25  
26  
27  
28  
29  
30  
31  
32  
33  
34  
35  
36  
37  
38  
39  
40  
41  
42  
43  
44  
45  
46  
47

|  |  |                                                                                                                                                                                                                                                                                                                                                                                                                     |
|--|--|---------------------------------------------------------------------------------------------------------------------------------------------------------------------------------------------------------------------------------------------------------------------------------------------------------------------------------------------------------------------------------------------------------------------|
|  |  | <p>Not my patient, don't have a relationship with them, hard to have a tough conversation [about deprescribing]" (Participant 3)</p> <p>There are some of our colleagues that if you were to try and suggest some alternative strategies would be [pause] a little sensitive. (Participant 5)</p> <p>This is one of those things, it's not my patient, I have to sort of Band-Aid the situation (Participant 8)</p> |
|--|--|---------------------------------------------------------------------------------------------------------------------------------------------------------------------------------------------------------------------------------------------------------------------------------------------------------------------------------------------------------------------------------------------------------------------|

Confidential

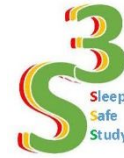

## Appendix 1 Sleep Safe Survey

|                            |    |      |       |     |
|----------------------------|----|------|-------|-----|
| Years in clinical practice | <5 | 6-10 | 11-15 | >16 |
|----------------------------|----|------|-------|-----|

Gender \_\_\_\_\_

### Management of Insomnia

1. The advantages of sleep medication outweigh the disadvantages

|                                            |                                   |                                  |                                |                                         |
|--------------------------------------------|-----------------------------------|----------------------------------|--------------------------------|-----------------------------------------|
| <input type="checkbox"/> Strongly disagree | <input type="checkbox"/> Disagree | <input type="checkbox"/> Neutral | <input type="checkbox"/> Agree | <input type="checkbox"/> Strongly agree |
|--------------------------------------------|-----------------------------------|----------------------------------|--------------------------------|-----------------------------------------|

2. There are no non-drug alternatives for sleep problems that are as effective as drugs

|                                            |                                   |                                  |                                |                                         |
|--------------------------------------------|-----------------------------------|----------------------------------|--------------------------------|-----------------------------------------|
| <input type="checkbox"/> Strongly disagree | <input type="checkbox"/> Disagree | <input type="checkbox"/> Neutral | <input type="checkbox"/> Agree | <input type="checkbox"/> Strongly agree |
|--------------------------------------------|-----------------------------------|----------------------------------|--------------------------------|-----------------------------------------|

3. I don't have time to treat sleep problems using non-drug therapies

|                                            |                                   |                                  |                                |                                         |
|--------------------------------------------|-----------------------------------|----------------------------------|--------------------------------|-----------------------------------------|
| <input type="checkbox"/> Strongly disagree | <input type="checkbox"/> Disagree | <input type="checkbox"/> Neutral | <input type="checkbox"/> Agree | <input type="checkbox"/> Strongly agree |
|--------------------------------------------|-----------------------------------|----------------------------------|--------------------------------|-----------------------------------------|

4. Non-medicine treatment of sleep problems is the business of other professionals

|                                            |                                   |                                  |                                |                                         |
|--------------------------------------------|-----------------------------------|----------------------------------|--------------------------------|-----------------------------------------|
| <input type="checkbox"/> Strongly disagree | <input type="checkbox"/> Disagree | <input type="checkbox"/> Neutral | <input type="checkbox"/> Agree | <input type="checkbox"/> Strongly agree |
|--------------------------------------------|-----------------------------------|----------------------------------|--------------------------------|-----------------------------------------|

5. Non-drug treatment of sleep problems needs to be supported with medication

|                                            |                                   |                                  |                                |                                         |
|--------------------------------------------|-----------------------------------|----------------------------------|--------------------------------|-----------------------------------------|
| <input type="checkbox"/> Strongly disagree | <input type="checkbox"/> Disagree | <input type="checkbox"/> Neutral | <input type="checkbox"/> Agree | <input type="checkbox"/> Strongly agree |
|--------------------------------------------|-----------------------------------|----------------------------------|--------------------------------|-----------------------------------------|

6. If I do not prescribe a medication to a patient with sleep problems s/he is dissatisfied

|                                            |                                   |                                  |                                |                                         |
|--------------------------------------------|-----------------------------------|----------------------------------|--------------------------------|-----------------------------------------|
| <input type="checkbox"/> Strongly disagree | <input type="checkbox"/> Disagree | <input type="checkbox"/> Neutral | <input type="checkbox"/> Agree | <input type="checkbox"/> Strongly agree |
|--------------------------------------------|-----------------------------------|----------------------------------|--------------------------------|-----------------------------------------|

7. It is difficult for a family doctor to motivate a patient with sleep problems to choose a non medicine treatment

|                                            |                                   |                                  |                                |                                         |
|--------------------------------------------|-----------------------------------|----------------------------------|--------------------------------|-----------------------------------------|
| <input type="checkbox"/> Strongly disagree | <input type="checkbox"/> Disagree | <input type="checkbox"/> Neutral | <input type="checkbox"/> Agree | <input type="checkbox"/> Strongly agree |
|--------------------------------------------|-----------------------------------|----------------------------------|--------------------------------|-----------------------------------------|

8. When I am not prescribing medication for sleep problems I feel like I am not empathic



|                                            |                                   |                                  |                                |                                         |
|--------------------------------------------|-----------------------------------|----------------------------------|--------------------------------|-----------------------------------------|
| <input type="checkbox"/> Strongly disagree | <input type="checkbox"/> Disagree | <input type="checkbox"/> Neutral | <input type="checkbox"/> Agree | <input type="checkbox"/> Strongly agree |
|--------------------------------------------|-----------------------------------|----------------------------------|--------------------------------|-----------------------------------------|

9. I have the expertise to use non-drug treatment for sleep problems

|                                            |                                   |                                  |                                |                                         |
|--------------------------------------------|-----------------------------------|----------------------------------|--------------------------------|-----------------------------------------|
| <input type="checkbox"/> Strongly disagree | <input type="checkbox"/> Disagree | <input type="checkbox"/> Neutral | <input type="checkbox"/> Agree | <input type="checkbox"/> Strongly agree |
|--------------------------------------------|-----------------------------------|----------------------------------|--------------------------------|-----------------------------------------|

10. I often feel overwhelmed when a patient presents with psychosocial problems

|                                            |                                   |                                  |                                |                                         |
|--------------------------------------------|-----------------------------------|----------------------------------|--------------------------------|-----------------------------------------|
| <input type="checkbox"/> Strongly disagree | <input type="checkbox"/> Disagree | <input type="checkbox"/> Neutral | <input type="checkbox"/> Agree | <input type="checkbox"/> Strongly agree |
|--------------------------------------------|-----------------------------------|----------------------------------|--------------------------------|-----------------------------------------|

11. I have tried in the past to prescribe less sleep medication

|                                            |                                   |                                  |                                |                                         |
|--------------------------------------------|-----------------------------------|----------------------------------|--------------------------------|-----------------------------------------|
| <input type="checkbox"/> Strongly disagree | <input type="checkbox"/> Disagree | <input type="checkbox"/> Neutral | <input type="checkbox"/> Agree | <input type="checkbox"/> Strongly agree |
|--------------------------------------------|-----------------------------------|----------------------------------|--------------------------------|-----------------------------------------|

12. I intend to prescribe less sleep medication but don't know how

|                                            |                                   |                                  |                                |                                         |
|--------------------------------------------|-----------------------------------|----------------------------------|--------------------------------|-----------------------------------------|
| <input type="checkbox"/> Strongly disagree | <input type="checkbox"/> Disagree | <input type="checkbox"/> Neutral | <input type="checkbox"/> Agree | <input type="checkbox"/> Strongly agree |
|--------------------------------------------|-----------------------------------|----------------------------------|--------------------------------|-----------------------------------------|

13.. I am trying at the moment to prescribe less sleep medication but without success

|                                            |                                   |                                  |                                |                                         |
|--------------------------------------------|-----------------------------------|----------------------------------|--------------------------------|-----------------------------------------|
| <input type="checkbox"/> Strongly disagree | <input type="checkbox"/> Disagree | <input type="checkbox"/> Neutral | <input type="checkbox"/> Agree | <input type="checkbox"/> Strongly agree |
|--------------------------------------------|-----------------------------------|----------------------------------|--------------------------------|-----------------------------------------|

14. I am trying at the moment to prescribe less sleep medication and have succeeded in doing so

|                                            |                                   |                                  |                                |                                         |
|--------------------------------------------|-----------------------------------|----------------------------------|--------------------------------|-----------------------------------------|
| <input type="checkbox"/> Strongly disagree | <input type="checkbox"/> Disagree | <input type="checkbox"/> Neutral | <input type="checkbox"/> Agree | <input type="checkbox"/> Strongly agree |
|--------------------------------------------|-----------------------------------|----------------------------------|--------------------------------|-----------------------------------------|

15. Would you like to add any comments?

**Please go to the next page!**

1  
2  
3  
4  
5  
6  
7  
8  
9  
10  
11  
12  
13  
14  
15  
16  
17  
18  
19  
20  
21  
22  
23  
24  
25  
26  
27  
28  
29  
30  
31  
32  
33  
34  
35  
36  
37  
38  
39  
40  
41  
42  
43  
44  
45  
46  
47  
48  
49  
50  
51  
52  
53  
54  
55  
56  
57  
58  
59  
60

**Consent for Qualitative Interview**

**Would you be willing to participate in a 30-45 minute interview about how you teach about insomnia in family medicine? (Consent sheet will be provided to participants)**

If Yes – please include your email so we may contact you

Email:

Confidential

Thank you!

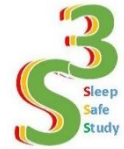

## Appendix 2 Sleep Safe Study: Interview Schedule

### Interview questions

#### Part 1: General exploration

Can you tell me about your approach to managing insomnia?

#### Part 2: Clinical vignettes

Is it OK if we run through some cases we frequently encounter?

##### **Case 1**

A 60 yoa woman attends asking for some help to sleep as her husband died ten days ago. They were married for 30 years. She is on Ramipril for hypertension but is otherwise well.

How might you approach this case?

What issues does this raise for learners?

*Part B:* During the course of the consultation, she mentions that she got some pills from her sister and wonders if she can get some more, she thinks its called ativan.

How might you approach this case?

What issues does this raise for learners?

Case rationale: This case is chosen as it relates to family physician's perception of the patient e.g. the 'deserving patient' (Sirdifield, 2013).

##### **Case 2**

A 35 yoa secretary, a patient of your colleague, attends for renewal of her escitalopram and zopiclone, she has been on these medications for 3 years and feels overall well but wishes to continue her pills. You are running behind in clinic.

How might you approach this case?

What issues does this raise for learners?

*Part B* What if the patient was asking for quetiapine?

Part B is added to explore family physicians use of antipsychotics, widely used off label for insomnia.

1  
2  
3 How might you approach this case?  
4

5 What issues does this raise for learners?  
6  
7

8  
9 Case rationale This case is chosen as it raises the issue of context in relation to a) managing a patient of  
10 a colleague. b) time management and clinical management.  
11  
12  
13

14 **Case 3**

15 A 47 yoa man, with a documented history of alcohol problems attends to ask for more clonazepam. He  
16 is on AISH income support for depression and chronic back pain. He has seen psychiatry in the past. He  
17 has been taking clonazepam for many years and occasionally asks for an early refill, which has been  
18 sanctioned by his doctor. He is presently 10 days early.  
19  
20

21  
22 How might you approach this case?  
23

24 What issues does this raise for learners?  
25  
26

27 Case rationale This case is chosen as it is a more complex case and offers an opportunity to explore self-  
28 efficacy and team approaches to insomnia. It also offers an opportunity to explore physicians'  
29 perceptions of patients (for example, in contrast to Case 1).  
30  
31  
32

33 Do you have any other comments or issues you'd like to raise?  
34  
35

36 Thank you  
37  
38  
39  
40  
41  
42  
43  
44  
45  
46  
47  
48  
49  
50  
51  
52  
53  
54  
55  
56  
57  
58  
59  
60

1  
2  
3 **Appendix C. Themes, subthemes and illustrative quotes**  
4

5  
6  
7  
8  
9  
10  
11  
12  
13  
14  
15  
16  
17  
18  
19  
20  
21  
22  
23  
24  
25  
26  
27  
28  
29  
30  
31  
32  
33  
34  
35  
36  
37  
38  
39  
40  
41  
42  
43  
44  
45  
46  
47

|                                    |                                                  |                       |                                                                                                                                                                                                                                                                                                                                                                                                                                                                                                                                                                                                                                                                                                                                                                                                                                                                                                                                                                                                                                                                                                                                                                                                                                                                                                                                                                                                                                                                                                                                                                                                                                                                                                    |
|------------------------------------|--------------------------------------------------|-----------------------|----------------------------------------------------------------------------------------------------------------------------------------------------------------------------------------------------------------------------------------------------------------------------------------------------------------------------------------------------------------------------------------------------------------------------------------------------------------------------------------------------------------------------------------------------------------------------------------------------------------------------------------------------------------------------------------------------------------------------------------------------------------------------------------------------------------------------------------------------------------------------------------------------------------------------------------------------------------------------------------------------------------------------------------------------------------------------------------------------------------------------------------------------------------------------------------------------------------------------------------------------------------------------------------------------------------------------------------------------------------------------------------------------------------------------------------------------------------------------------------------------------------------------------------------------------------------------------------------------------------------------------------------------------------------------------------------------|
| General approach to sleep disorder | Sleeping problems are a symptom, not a diagnosis | Exploring the problem | <p>And I would want to really flesh that out first. So, asking sort of why is it that you're not sleeping and what's going through your mind when you're laying down, and I would suspect that that would unearth quite a bit of kind of emotional baggage and, you know, grief, maybe depression, maybe some, you know, ruminating thoughts or guilt or whatever it is that she's processing that's going through that. Participant 4</p> <p>[Explore] kind of those bigger picture things, and just try to really get a sense of this patient's context. So, yeah, like how is she coping, what are her support systems, what is she doing to help herself through this difficult time. Yeah, and then like in the background is there a family history of mental health issues, and is there a previous history of sleep disturbance and those kind of things. Certainly if she's using any unhealthy coping mechanisms like alcohol or stuff like that, that can affect sleep. Really try to get a sense of what her expectations are, especially if she's expecting a prescription for a sleep medication, what she knows about sleep medications or what she knows about healthy sleep habits. I would try to get a sense of that. Participant 6</p> <p>so look at all the other factors that might be affecting this person..... You know, who knows what else is going on? Participant 8</p> <p>Insomnia can be part of other health problems right? So you know, just you know back to the sleep history, trying to figure out well are they not sleeping because of pain? Are they not sleeping because they've got major depression that hasn't been treated properly and it's like</p> |
|------------------------------------|--------------------------------------------------|-----------------------|----------------------------------------------------------------------------------------------------------------------------------------------------------------------------------------------------------------------------------------------------------------------------------------------------------------------------------------------------------------------------------------------------------------------------------------------------------------------------------------------------------------------------------------------------------------------------------------------------------------------------------------------------------------------------------------------------------------------------------------------------------------------------------------------------------------------------------------------------------------------------------------------------------------------------------------------------------------------------------------------------------------------------------------------------------------------------------------------------------------------------------------------------------------------------------------------------------------------------------------------------------------------------------------------------------------------------------------------------------------------------------------------------------------------------------------------------------------------------------------------------------------------------------------------------------------------------------------------------------------------------------------------------------------------------------------------------|

1  
2  
3  
4  
5  
6  
7  
8  
9  
10  
11  
12  
13  
14  
15  
16  
17  
18  
19  
20  
21  
22  
23  
24  
25  
26  
27  
28  
29  
30  
31  
32  
33  
34  
35  
36  
37  
38  
39  
40  
41  
42  
43  
44  
45  
46  
47

|  |  |                                                                     |                                                                                                                                                                                                                                                                                                                                                                                                                                                                                                                                                                                                                                                                                                                                                                                                                                                                                                                                                                                                                                                                                                                                                                                                                                          |
|--|--|---------------------------------------------------------------------|------------------------------------------------------------------------------------------------------------------------------------------------------------------------------------------------------------------------------------------------------------------------------------------------------------------------------------------------------------------------------------------------------------------------------------------------------------------------------------------------------------------------------------------------------------------------------------------------------------------------------------------------------------------------------------------------------------------------------------------------------------------------------------------------------------------------------------------------------------------------------------------------------------------------------------------------------------------------------------------------------------------------------------------------------------------------------------------------------------------------------------------------------------------------------------------------------------------------------------------|
|  |  |                                                                     | an organic piece there? Participant 10                                                                                                                                                                                                                                                                                                                                                                                                                                                                                                                                                                                                                                                                                                                                                                                                                                                                                                                                                                                                                                                                                                                                                                                                   |
|  |  | Exploring takes time                                                | <p>If I'm running behind my clinic, this is something that warrants a deeper dive and a more in-depth conversation. Which obviously isn't going to be feasible on the day. So, I would refill and ask the – just, you know, let the patient know there is – there's other alternatives out there and this may or may not be an appropriate medication for you, but I can't really tell based on, you know, a limited interaction today. So, I'd really like it if we could connect for a bit of a longer session and talk about what this has been doing for you in the past, whether it's still working, make sure that you're aware of, you know, all the risks and alternatives that go along with this. Participant 4</p> <p>Like a refill, refill, done. [...] If we're running behind and this is a refill and we are swamped it's unlikely that I would have the resident do anything more than, "There's other options out there have you thought about these?" Participant 5</p> <p>But I think certainly patient expectations around insomnia is a huge thing. Like sometimes it's actually like I can't even get to treatment on the first or second visit because it's just managing patient expectations. Participant 6</p> |
|  |  | Sleep disorder can be emotional<br>- for patient<br>- for physician | <p>But it's such an emotional topic for patients and some of the concepts in CBT for insomnia are so counterintuitive that it takes a while to really help people understand it. Participant 2</p> <p>I think sleep is an emotional discussion, right? Like, people get very upset about the lack of sleep, or perceived poor sleep. [Patients] who are not getting sleep lose the ability to be perfectly rational. Participant 3</p>                                                                                                                                                                                                                                                                                                                                                                                                                                                                                                                                                                                                                                                                                                                                                                                                   |

|  |                                    |                                    |                                                                                                                                                                                                                                                                                                                                                                                                                                                                                                                                                                                                                                                                                                                                                                                          |
|--|------------------------------------|------------------------------------|------------------------------------------------------------------------------------------------------------------------------------------------------------------------------------------------------------------------------------------------------------------------------------------------------------------------------------------------------------------------------------------------------------------------------------------------------------------------------------------------------------------------------------------------------------------------------------------------------------------------------------------------------------------------------------------------------------------------------------------------------------------------------------------|
|  |                                    |                                    | Looking at that emotionality. Participant 7                                                                                                                                                                                                                                                                                                                                                                                                                                                                                                                                                                                                                                                                                                                                              |
|  | Individualising care               | Different from other presentations | <p>It's very dissimilar to the approach to a lot of other meds, you know. Like managing asthma. Yeah, there's a little bit of individualization in someone's asthma action plan, but there's only so many ways you can create an asthma action plan. Participant 2</p> <p>I don't have a sort of formula for it. Participant 7</p> <p>It's a very situational kind of thing. Participant 8</p>                                                                                                                                                                                                                                                                                                                                                                                           |
|  |                                    | Individualize plans                | <p>So, then rapid follow up to go to other layers of stress management and maybe teach her Body Scan. She would probably be really amenable to it. I've known her for a long time, and she likes that sort of thing. You know she's not someone that would want to be taking Zopiclone. Participant 1</p> <p>It's individual medicine it doesn't follow guidelines. It's like you're breaking rules so that you can actually do what's right.... So it's just a matter of knowing when patients are the exception and when you have to work with these drugs smartly and safely to help your patients. Participant 2</p> <p>where clinical judgment and therapeutic relationship with the patient and kind of a longitudinal multi-step treatment plan come into play. Participant 4</p> |
|  | Balancing risks and breaking rules | Medication awareness               | <p>I'm not a huge fan of Zopiclone. But ....I might use, I might use Zopiclone. And why? Just because it's super short-term, you know. , I don't love the Benzo's. I certainly don't want them to take Gravol. Because we just know it doesn't benefit the sleep cycle. You know, it makes things worse. I think Benzo, is similar to treating your sleep with booze, which many people do. You know and get sleepy</p>                                                                                                                                                                                                                                                                                                                                                                  |

1  
2  
3  
4  
5  
6  
7  
8  
9  
10  
11  
12  
13  
14  
15  
16  
17  
18  
19  
20  
21  
22  
23  
24  
25  
26  
27  
28  
29  
30  
31  
32  
33  
34  
35  
36  
37  
38  
39  
40  
41  
42  
43  
44  
45  
46  
47

|  |  |  |                                                                                                                                                                                                                                                                                                                                                                                                                                                                                                                                                                                                                                                                                                                                                                                                                                                                                                                                                                                                                                                                                                                                                                                                                                                                                                                                                                                                                                                                                                                                                                                                                                                                                                                               |
|--|--|--|-------------------------------------------------------------------------------------------------------------------------------------------------------------------------------------------------------------------------------------------------------------------------------------------------------------------------------------------------------------------------------------------------------------------------------------------------------------------------------------------------------------------------------------------------------------------------------------------------------------------------------------------------------------------------------------------------------------------------------------------------------------------------------------------------------------------------------------------------------------------------------------------------------------------------------------------------------------------------------------------------------------------------------------------------------------------------------------------------------------------------------------------------------------------------------------------------------------------------------------------------------------------------------------------------------------------------------------------------------------------------------------------------------------------------------------------------------------------------------------------------------------------------------------------------------------------------------------------------------------------------------------------------------------------------------------------------------------------------------|
|  |  |  | <p>with booze, but then it wrecks the sleep cycle. So then over time they get more tired and over time they may get more depressed. Participant 1</p> <p>I am slightly – I call it crazy – I hate [Z]-drugs, and usually when patients talk to me about insomnia, they want a Z-drug.... I think I’ve seen such terrible consequences for my patients and for family members on Z-drugs that I’m very hesitant about it. ... I think all of these drugs to treat insomnia sometimes mask the problem. Participant 3</p> <p>So, on one hand, you need to balance an unsafe mixture of GABAergic medications with, you know, your risk of seizure if you disrupt kind of the balance that’s been struck with long-term tolerance. So, in a situation like that, I guess social and medical stability is probably my biggest consideration. I would not want to make any medication changes that are going to disrupt a medically stable for the time being situation. With that being said, that status quo doesn’t sound very acceptable from a risk standpoint to me. And so, the very frank discussion that I would have would be, look, mixing, you know, alcohol and benzos is not safe, these are the potential risks. You know, there’s not – going cold turkey on either one of those is not a good way of tapering down and is quite dangerous. This is where it’s really important to kind of assess where the patient’s at first before trying to make any kind of recommendations. Participant 4</p> <p>I also try and get them to not jump to medication as kind of a first line. And if they’re going to take kind of a medication route, to just be aware of the breadth of different options. Participant 4</p> |
|--|--|--|-------------------------------------------------------------------------------------------------------------------------------------------------------------------------------------------------------------------------------------------------------------------------------------------------------------------------------------------------------------------------------------------------------------------------------------------------------------------------------------------------------------------------------------------------------------------------------------------------------------------------------------------------------------------------------------------------------------------------------------------------------------------------------------------------------------------------------------------------------------------------------------------------------------------------------------------------------------------------------------------------------------------------------------------------------------------------------------------------------------------------------------------------------------------------------------------------------------------------------------------------------------------------------------------------------------------------------------------------------------------------------------------------------------------------------------------------------------------------------------------------------------------------------------------------------------------------------------------------------------------------------------------------------------------------------------------------------------------------------|



1  
2  
3  
4  
5  
6  
7  
8  
9  
10  
11  
12  
13  
14  
15  
16  
17  
18  
19  
20  
21  
22  
23  
24  
25  
26  
27  
28  
29  
30  
31  
32  
33  
34  
35  
36  
37  
38  
39  
40  
41  
42  
43  
44  
45  
46  
47

|  |  |  |                                                                                                                                                                                                                                                                                                                                                                                                                                                                                                                                                                                                                                                                                                                                                                                                                                                                                                                                                                                                                                                                                                                                                                                                                                                                                                                                                                                                                                                                                                                                                                                                                   |
|--|--|--|-------------------------------------------------------------------------------------------------------------------------------------------------------------------------------------------------------------------------------------------------------------------------------------------------------------------------------------------------------------------------------------------------------------------------------------------------------------------------------------------------------------------------------------------------------------------------------------------------------------------------------------------------------------------------------------------------------------------------------------------------------------------------------------------------------------------------------------------------------------------------------------------------------------------------------------------------------------------------------------------------------------------------------------------------------------------------------------------------------------------------------------------------------------------------------------------------------------------------------------------------------------------------------------------------------------------------------------------------------------------------------------------------------------------------------------------------------------------------------------------------------------------------------------------------------------------------------------------------------------------|
|  |  |  | <p>So we all know that it's not our go-to strategy, but we also accept that there is a role in certain situations and that we'd be willing to meet our patients sort of half-way with that. And then we do lots of counselling around potential adverse effects and consequences of using things like Z-drugs. Participant 7</p> <p>Ah, this is your classic difficult patient. We have many red flags in this story, the chronic pain, the alcohol, the benzodiazepine use, etc., the early refills. These are all red flags and dangers and cautions with that medication. So really, you're thinking in the back of your mind we need to get this guy off of this medication because he's either subverting it, so selling it to somebody else, or he's taking too much himself, highly risky in a person drinking alcohol. Participant 4</p> <p>This guy can kill himself if he's not careful, and you could be a participant in that, which you don't really want to be. So I think – and then you can't, if he's been on it a long, long time, you don't want to suddenly pull it and withdraw from benzodiazepine, you know. He'll get delirious and seize or shaking and sweating and anxious, and, you know, in being off it, so there's not an easy way. Participant 8</p> <p>I'm not a huge one in favour of medications. I don't believe in medications. If we do use them, try not to use the benzos, use the tricyclic or something else, depending on the patient, whether it's safe or not. Participant 8</p> <p>So Z-drugs, I use very, very sparingly – very, very sparingly. Participant 9</p> |
|--|--|--|-------------------------------------------------------------------------------------------------------------------------------------------------------------------------------------------------------------------------------------------------------------------------------------------------------------------------------------------------------------------------------------------------------------------------------------------------------------------------------------------------------------------------------------------------------------------------------------------------------------------------------------------------------------------------------------------------------------------------------------------------------------------------------------------------------------------------------------------------------------------------------------------------------------------------------------------------------------------------------------------------------------------------------------------------------------------------------------------------------------------------------------------------------------------------------------------------------------------------------------------------------------------------------------------------------------------------------------------------------------------------------------------------------------------------------------------------------------------------------------------------------------------------------------------------------------------------------------------------------------------|

1  
2  
3  
4  
5  
6  
7  
8  
9  
10  
11  
12  
13  
14  
15  
16  
17  
18  
19  
20  
21  
22  
23  
24  
25  
26  
27  
28  
29  
30  
31  
32  
33  
34  
35  
36  
37  
38  
39  
40  
41  
42  
43  
44  
45  
46  
47

|  |  |                              |                                                                                                                                                                                                                                                                                                                                                                                                                                                                                                                                                                                                                                                                                                                                                                                                                                                                                                                                                                                                                                                                                                                                                                                                                         |
|--|--|------------------------------|-------------------------------------------------------------------------------------------------------------------------------------------------------------------------------------------------------------------------------------------------------------------------------------------------------------------------------------------------------------------------------------------------------------------------------------------------------------------------------------------------------------------------------------------------------------------------------------------------------------------------------------------------------------------------------------------------------------------------------------------------------------------------------------------------------------------------------------------------------------------------------------------------------------------------------------------------------------------------------------------------------------------------------------------------------------------------------------------------------------------------------------------------------------------------------------------------------------------------|
|  |  |                              | Benzos seem to be pretty taboo right now. Or like in the past few years, they've really gotten a really bad rap. Participant 10                                                                                                                                                                                                                                                                                                                                                                                                                                                                                                                                                                                                                                                                                                                                                                                                                                                                                                                                                                                                                                                                                         |
|  |  | Balancing and breaking rules | <p>You have to be really comfortable with uncertainty. Participant 2</p> <p>Just because something is not first line in long-term use doesn't mean that it's not appropriate in specific situations. real life medicine isn't kind of a black and white, that guidelines that say, you know, you should try not to use certain medications in situations doesn't mean that you can ever use them and that it's not ever appropriate to use them. Participant 4</p> <p>insomnia treatment in general, and it's that it's very challenging, it's something that I think often you need to balance compassion for the patient's experience, much like, I think, you know, depression or anxiety. It's – it affects different people in different ways. And so, you can never really make an assumption about how debilitating someone's – or bothersome someone's insomnia is. But that's something that always needs to be balanced with the fact that a lot of the treatments and a lot of the most common treatments that people have been on or exposed to or heard about are quite dangerous or risky when misused. Participant 4</p> <p>You're trying to balance risks and benefits for a patient. Participant 7</p> |
|  |  | Give and take                | I always say like I'm not saying you can't have your meds, I will give you your meds if that's what you want. But I just want to talk about some other options just to know if you're aware of them. Participant 2                                                                                                                                                                                                                                                                                                                                                                                                                                                                                                                                                                                                                                                                                                                                                                                                                                                                                                                                                                                                      |

|  |                                   |                                         |                                                                                                                                                                                                                                                                                                                                                                                                                                                                                                                                                                                                                                                                                                                                                                                                                                                                                       |
|--|-----------------------------------|-----------------------------------------|---------------------------------------------------------------------------------------------------------------------------------------------------------------------------------------------------------------------------------------------------------------------------------------------------------------------------------------------------------------------------------------------------------------------------------------------------------------------------------------------------------------------------------------------------------------------------------------------------------------------------------------------------------------------------------------------------------------------------------------------------------------------------------------------------------------------------------------------------------------------------------------|
|  |                                   |                                         | <p>I am not taking this away from you. This is not – today we are not taking this away from you. But I do want to make sure that we're using the best methods for you to sleep the most efficient and to feel the best you can feel, especially after a good night's rest. And would you be open to other options, if there are better options?<br/>Participant 9</p> <p>My approach usually, when a patient requests for something, is the first thing I say to them is like, yeah we can totally get you something like that. Like I just kind of agree with them. And then I go on to explain, and we also have some other options so let's discuss kind of what all the options are and then we can decide what would be best for you. Participant 10</p>                                                                                                                         |
|  | Establishing therapeutic alliance | Establishing trust – showing compassion | <p>You just have to stop judging, and you have to keep them safe. Participant 2</p> <p>I try really hard to come at it from, like, not a point of judgment, like, I don't want them to feel embarrassed or ashamed of whatever the reasoning behind the early dispensing or the early refill request is, but just to understand. Participant 3</p> <p>I think that this case has a lot of room for judgment. Right? And it's hard to be non-judgmental. And I learned it really hard, because I used to work at [cups] downtown, right? And so, you saw – I saw a lot of, you know, street-involved or homeless or [unintelligible 00:55:58] dependent and alcohol and drugs and, like, there's so much more complexity to their social circumstance that I had to learn to be non-judgmental. Participant 3</p> <p>Because, like, grief is hard. Like, I don't know that I would</p> |

1  
2  
3  
4  
5  
6  
7  
8  
9  
10  
11  
12  
13  
14  
15  
16  
17  
18  
19  
20  
21  
22  
23  
24  
25  
26  
27  
28  
29  
30  
31  
32  
33  
34  
35  
36  
37  
38  
39  
40  
41  
42  
43  
44  
45  
46  
47

|  |  |  |                                                                                                                                                                                                                                                                                                                                                                                                                                                                                                                                                                                                                                                                                                                                                                                                                                                                                                                                                                                                                                                                                                                                                                                                                                                                                                                                                                                                         |
|--|--|--|---------------------------------------------------------------------------------------------------------------------------------------------------------------------------------------------------------------------------------------------------------------------------------------------------------------------------------------------------------------------------------------------------------------------------------------------------------------------------------------------------------------------------------------------------------------------------------------------------------------------------------------------------------------------------------------------------------------------------------------------------------------------------------------------------------------------------------------------------------------------------------------------------------------------------------------------------------------------------------------------------------------------------------------------------------------------------------------------------------------------------------------------------------------------------------------------------------------------------------------------------------------------------------------------------------------------------------------------------------------------------------------------------------|
|  |  |  | <p>necessarily, like, wag my finger at her about it. Participant 3</p> <p>It takes patient buy-in, and that alone also takes time in hearing and validating their experiences and trying to develop a bit of a therapeutic alliance before stepping into your management plan. Participant 4</p> <p>I think that one thing that I try to emphasize is the centrality of that patient trust and validating that patient experience, and not just being focused on kind of a single minded de-prescribing paradigm. Participant 4</p> <p>being able to suggest and offer alternatives to that, there needs to be that understanding that they know that you understand what they're going through. And sometimes that can happen on the first visit, and sometimes that's something that's built with time. Participant 4</p> <p>I think that one thing that I try to emphasize is the centrality of that patient trust and validating that patient experience, and not just being focused on kind of a single minded de-prescribing paradigm. Participant 4</p> <p>I tend not to be hard-nosed about that [laughs] because it doesn't really help. Participant 5</p> <p>Don't focus too much on the sleep and realise you have somebody who's grieving, and that's your first thing is to listen to this person and offer support. Participant 8</p> <p>I'd have them be very cautious about how you</p> |
|--|--|--|---------------------------------------------------------------------------------------------------------------------------------------------------------------------------------------------------------------------------------------------------------------------------------------------------------------------------------------------------------------------------------------------------------------------------------------------------------------------------------------------------------------------------------------------------------------------------------------------------------------------------------------------------------------------------------------------------------------------------------------------------------------------------------------------------------------------------------------------------------------------------------------------------------------------------------------------------------------------------------------------------------------------------------------------------------------------------------------------------------------------------------------------------------------------------------------------------------------------------------------------------------------------------------------------------------------------------------------------------------------------------------------------------------|

|  |  |                        |                                                                                                                                                                                                                                                                                                                                                                                                                                                                                                                                                                                                                                                                                                                                                                                                  |
|--|--|------------------------|--------------------------------------------------------------------------------------------------------------------------------------------------------------------------------------------------------------------------------------------------------------------------------------------------------------------------------------------------------------------------------------------------------------------------------------------------------------------------------------------------------------------------------------------------------------------------------------------------------------------------------------------------------------------------------------------------------------------------------------------------------------------------------------------------|
|  |  |                        | <p>approach them, because they're having a difficult time and you're being a support for these people. Participant 8</p> <p>So, then I'll have to be a little more sensitive around talking about that medication. Because they don't have the established relationship with me. Participant 9</p> <p>I would hope it's somebody that I know already, that I have a bit of a therapeutic relationship with. I guess I would like to understand just where she's, like just how things are affecting her. Participant 10</p>                                                                                                                                                                                                                                                                      |
|  |  | Shared decision-making | <p>You know, and depending on how that went, if the patient was not open at all – like it's – I mean it's a bit like stages of change in motivational interviewing, if they were totally pre-contemplative, then you handle it like that. .... And if they're totally pre-contemplative, you leave it open, like you know, that's totally fine, it's your health. It's your choice. Participant 2</p> <p>You're much more likely to be successful and engaging with the patient and keeping them on side if you are a collaborator. Participant 5</p> <p>Look for opportunities to see if they're in that contemplative phase. Participant 7</p> <p>Like, This is – I'm not telling you this is how we're going to do things. This is – we're going to decide as a, as a team. Participant 9</p> |
|  |  | Sharing evidence       | <p>**exception battling: either I have the conversation or I have the battle about me not prescribing. Participant 3</p>                                                                                                                                                                                                                                                                                                                                                                                                                                                                                                                                                                                                                                                                         |

1  
2  
3  
4  
5  
6  
7  
8  
9  
10  
11  
12  
13  
14  
15  
16  
17  
18  
19  
20  
21  
22  
23  
24  
25  
26  
27  
28  
29  
30  
31  
32  
33  
34  
35  
36  
37  
38  
39  
40  
41  
42  
43  
44  
45  
46  
47

|                                      |                         |  |                                                                                                                                                                                                                                                                                                                                                                                                                                                                                                                                                                                                                                                                                                                                                                                                                                                                                                                                        |
|--------------------------------------|-------------------------|--|----------------------------------------------------------------------------------------------------------------------------------------------------------------------------------------------------------------------------------------------------------------------------------------------------------------------------------------------------------------------------------------------------------------------------------------------------------------------------------------------------------------------------------------------------------------------------------------------------------------------------------------------------------------------------------------------------------------------------------------------------------------------------------------------------------------------------------------------------------------------------------------------------------------------------------------|
|                                      |                         |  | <p>It was a beautiful study but it was like 40% improvement using credible rating scales. Participant 5</p> <p>I have a really good hand-out. Participant 6</p> <p>I usually have like my RxFiles with me. Because most of them know Zopiclone. Most of them know, like Melatonin. So, I'll have that with me so that we can go through the RxFiles together to see, "OK. Well how does it work? What's the evidence for it? Participant 9</p> <p>Like I'll do a little bit of the top guidelines with them maybe. Participant 9</p> <p>I'll say, This is the evidence. Like this is the evidence for and against. This is where I'm coming from. Participant 9</p>                                                                                                                                                                                                                                                                    |
| <p>Deviations from standard care</p> | <p>Valid exceptions</p> |  | <p>[...] So it's just a matter of knowing when patients are the exception and when you have to work with these drugs smartly and safely to help your patients. Participant 2</p> <p>So, there are definitely significant exceptions regarding Z-drugs, I have easily, like, five patients I can think of that I do prescribe without question for.....There are totally reasonable exceptions, but I won't understand if a person meets my reasonable expectation or exception criteria if I don't have this conversation with them. So, you know, with an acute stressor like this, I think that we had come up with this a little bit in, like, talking about some of my past examples, I automatically see a lane into my exception pathway. Participant 3</p> <p>There is a difference between somebody who's had the occasional Z-drugs for flying and stuff like that and then somebody who's regularly on it. Participant 5</p> |

|  |                                         |                                                |                                                                                                                                                                                                                                                                                                                                                                                                                                                                                                                                                                                                                                                                                                           |
|--|-----------------------------------------|------------------------------------------------|-----------------------------------------------------------------------------------------------------------------------------------------------------------------------------------------------------------------------------------------------------------------------------------------------------------------------------------------------------------------------------------------------------------------------------------------------------------------------------------------------------------------------------------------------------------------------------------------------------------------------------------------------------------------------------------------------------------|
|  |                                         |                                                | <p>I think I am a little less hesitant to use sedatives because I feel comfortable in choosing patients that I'm going to be able to get off of them once we get them through whatever. Participant 7</p>                                                                                                                                                                                                                                                                                                                                                                                                                                                                                                 |
|  |                                         | <p>Short duration<br/>Acute stress</p>         | <p>prescriptions listed but like they're for five days. Participant 2</p> <p>And so, for a very, very brief period of time, I prescribed for him. Participant 3</p> <p>based on it's a short period of time. Participant 6</p> <p>And I think I justify that based on it's a short period of time, it's an extremely stressful period of time. Participant 6</p> <p>You're seeing someone who's more in acute distress and you may be more willing to give them a simple temporary solution. Participant 7</p> <p>I don't believe in medications. If we do use them, ....I use it very short term. I set that expectation very early, But in the short-term, it could potentially help. Participant 8</p> |
|  | <p>Caring for a colleague's patient</p> | <p>Can't step into another providers shoes</p> | <p>Bring it up, but, again, not my patient, don't have a relationship with them. Participant 3</p> <p>Something that I've – in my own personal practice – realized over the course of locum-ing for several physicians is that you can't step into another provider's shoes and expect to change, you know, a multi-decade treatment plan over the course of a week. And so, there's always a bit of a balance there, and I think a lot of that</p>                                                                                                                                                                                                                                                       |

1  
2  
3  
4  
5  
6  
7  
8  
9  
10  
11  
12  
13  
14  
15  
16  
17  
18  
19  
20  
21  
22  
23  
24  
25  
26  
27  
28  
29  
30  
31  
32  
33  
34  
35  
36  
37  
38  
39  
40  
41  
42  
43  
44  
45  
46  
47

|  |  |                    |                                                                                                                                                                                                                                                                                                                                                                                                                                                                                                                                                                                                                                                                                                                                                                                                                                                                                                                                                                                                                                                                                                                                                                                                                                                                                                                                                                                                                                                                                                                                                                                                        |
|--|--|--------------------|--------------------------------------------------------------------------------------------------------------------------------------------------------------------------------------------------------------------------------------------------------------------------------------------------------------------------------------------------------------------------------------------------------------------------------------------------------------------------------------------------------------------------------------------------------------------------------------------------------------------------------------------------------------------------------------------------------------------------------------------------------------------------------------------------------------------------------------------------------------------------------------------------------------------------------------------------------------------------------------------------------------------------------------------------------------------------------------------------------------------------------------------------------------------------------------------------------------------------------------------------------------------------------------------------------------------------------------------------------------------------------------------------------------------------------------------------------------------------------------------------------------------------------------------------------------------------------------------------------|
|  |  |                    | <p>depends on how the interaction goes with the patient and how responsive the patient is. There's no sense in fragmenting or – a relationship with a patient or making the patient feel either nervous or discriminated against or anything like that when, you know, you're not the one that's going to be able to really speak into that patient's treatment plan on an ongoing basis, or deal with the symptoms if your proposed alternative doesn't work. Participant 4</p> <p>So I approach it from a perspective of this isn't my patient, I want to respect the fact that I don't know their history, I don't know what they've been – like what the decisions are that have been made by their previous physician, or their regular physician I should say in this case. So I'll approach it from a perspective of I'm probably not going to change things today, and I shouldn't, maybe, because this is not my patient, I'm not responsible for their ongoing care, but with the same knowledge that I can take an opportunity to do some education with a patient. Participant 6</p> <p>You don't know how that all ended up like that, so rather than focusing on that, it's just how do we go from here and making suggestions. Participant 8</p> <p>I mean if somebody's been on zopiclone and I can see from the record it's been pretty stable and that's what they've been using, usually I'm not, I don't really like being another chef in the kitchen, I don't like adding to something or like I don't know the history so maybe she's tried a lot of things. Participant 10</p> |
|  |  | Don't step on toes | There are some of our colleagues that if you were to try and suggest some alternative strategies would be [pause]                                                                                                                                                                                                                                                                                                                                                                                                                                                                                                                                                                                                                                                                                                                                                                                                                                                                                                                                                                                                                                                                                                                                                                                                                                                                                                                                                                                                                                                                                      |



|  |  |                                                                                           |                                                                                                                                                                                                                                                                                                                                                                                                                                                                                                                                                                                                                                                                                                                                                                                                                                                                                                                                                                                                                                                                                                                                                                                                                                                    |
|--|--|-------------------------------------------------------------------------------------------|----------------------------------------------------------------------------------------------------------------------------------------------------------------------------------------------------------------------------------------------------------------------------------------------------------------------------------------------------------------------------------------------------------------------------------------------------------------------------------------------------------------------------------------------------------------------------------------------------------------------------------------------------------------------------------------------------------------------------------------------------------------------------------------------------------------------------------------------------------------------------------------------------------------------------------------------------------------------------------------------------------------------------------------------------------------------------------------------------------------------------------------------------------------------------------------------------------------------------------------------------|
|  |  |                                                                                           | <p>a little sensitive. Participant 5</p> <p>You're not wanting to step on the toes of the primary doctor but trying to maintain some consistency with the messaging between the primary doctor and you.<br/>Participant 7</p> <p>You don't want to offend our colleague, and we all live in a glasshouse and we don't want to throw rocks.<br/>Participant 8</p>                                                                                                                                                                                                                                                                                                                                                                                                                                                                                                                                                                                                                                                                                                                                                                                                                                                                                   |
|  |  | <p>Balancing 2 (navigating uncertainty); bridge, band aid, patchwork, planting a seed</p> | <p>I think about that, this is not my patient, this is not my patient to have that discussion with. I am covering for a colleague to some extent. But I'm still responsible for prescribing. So, it's balancing those two things. I will bridge you until then, these are the reasons I'm not giving you a long prescription, because I am uncomfortable, these are not how these drugs are meant to be used, and there's maybe more work that needs to be done.<br/>Participant 3</p> <p>And it's this really fine balance, because I really believe that I have to take responsibility for every prescription I write, and I can't hide behind this idea of, well, if somebody else does it, so I'm just covering for them. Right? Because that's a little bit of that horrible locum practicing or that horrible, like, walk-in medicine style, where, "Oh, this person's been on it for ages, I don't need more history, just keep going." Like, I have to be responsible for what I prescribe. Participant 3</p> <p>I will bridge you until then, these are the reasons I'm not giving you a long prescription, because I am uncomfortable, these are not how these drugs are meant to be used, and there's maybe more work that needs to</p> |

1  
2  
3  
4  
5  
6  
7  
8  
9  
10  
11  
12  
13  
14  
15  
16  
17  
18  
19  
20  
21  
22  
23  
24  
25  
26  
27  
28  
29  
30  
31  
32  
33  
34  
35  
36  
37  
38  
39  
40  
41  
42  
43  
44  
45  
46  
47

|  |  |  |                                                                                                                                                                                                                                                                                                                                                                                                                                                                                                                                                                                                                                                                                                                                                                                                                                                                                                                                                                                                                                                                                                                                                                                                                                                                                                                                                                                                                                                                                                                                                                                                                                                                              |
|--|--|--|------------------------------------------------------------------------------------------------------------------------------------------------------------------------------------------------------------------------------------------------------------------------------------------------------------------------------------------------------------------------------------------------------------------------------------------------------------------------------------------------------------------------------------------------------------------------------------------------------------------------------------------------------------------------------------------------------------------------------------------------------------------------------------------------------------------------------------------------------------------------------------------------------------------------------------------------------------------------------------------------------------------------------------------------------------------------------------------------------------------------------------------------------------------------------------------------------------------------------------------------------------------------------------------------------------------------------------------------------------------------------------------------------------------------------------------------------------------------------------------------------------------------------------------------------------------------------------------------------------------------------------------------------------------------------|
|  |  |  | <p>be done. Participant 3</p> <p>of how do you manage a treatment plan that you maybe don't personally agree with, but that has been initiated by another prescriber? And so, the idea of sort of immediate patient safety being a number one consideration and then not trying to kind of go off and do your own thing, but involve, you know, their provider in whatever you want to do or whatever you think needs to be done as a long-term plan. Participant 4</p> <p>I would probably probe the patient a little bit, time permitting, and just get a sense of, first of all, whether there's any significant, like, immediate red flags, you know, like, escalating doses of Zopiclone or early refills or things like that. Something like that, I would probably flag – I would refill, you know, a short course and ask them to follow-up with their primary provider and probably send them a message. If it doesn't seem like there's anything like that, then I would probably throw out a bit of a prompt to the patient and just say, you know what, there could be some alternatives here that might work better for you. Participant 4</p> <p>So then do I put a bit of a patchwork plan together to get him to the primary doctor so that he can fix the problem. That's I think the ideal scenario, so I don't want him to go into withdrawal, I want to set some limits though, so I may not give him – I wouldn't like to give him his usual dosing, but I might give him enough to just keep him out of the emergency room until his primary doctor can see him. Participant 6</p> <p>I might just give them a shorter prescription. Participant 6</p> |
|--|--|--|------------------------------------------------------------------------------------------------------------------------------------------------------------------------------------------------------------------------------------------------------------------------------------------------------------------------------------------------------------------------------------------------------------------------------------------------------------------------------------------------------------------------------------------------------------------------------------------------------------------------------------------------------------------------------------------------------------------------------------------------------------------------------------------------------------------------------------------------------------------------------------------------------------------------------------------------------------------------------------------------------------------------------------------------------------------------------------------------------------------------------------------------------------------------------------------------------------------------------------------------------------------------------------------------------------------------------------------------------------------------------------------------------------------------------------------------------------------------------------------------------------------------------------------------------------------------------------------------------------------------------------------------------------------------------|

1  
2  
3  
4  
5  
6  
7  
8  
9  
10  
11  
12  
13  
14  
15  
16  
17  
18  
19  
20  
21  
22  
23  
24  
25  
26  
27  
28  
29  
30  
31  
32  
33  
34  
35  
36  
37  
38  
39  
40  
41  
42  
43  
44  
45  
46  
47

|  |  |  |                                                                                                                                                                                                                                                                                                                                                                                                                                                                                                                                                                                                                                                                                                                                                                                                                                                                                                                                                                                                                                                                                                                                                                                                                                                                                                                                                                                                                                                                                                                                                                                                                                                                                                     |
|--|--|--|-----------------------------------------------------------------------------------------------------------------------------------------------------------------------------------------------------------------------------------------------------------------------------------------------------------------------------------------------------------------------------------------------------------------------------------------------------------------------------------------------------------------------------------------------------------------------------------------------------------------------------------------------------------------------------------------------------------------------------------------------------------------------------------------------------------------------------------------------------------------------------------------------------------------------------------------------------------------------------------------------------------------------------------------------------------------------------------------------------------------------------------------------------------------------------------------------------------------------------------------------------------------------------------------------------------------------------------------------------------------------------------------------------------------------------------------------------------------------------------------------------------------------------------------------------------------------------------------------------------------------------------------------------------------------------------------------------|
|  |  |  | <p>To summarise, my approach to these patients is always what's your stage of change. Because if their stage of change is like pre-contemplative then you're definitely not going to make a change, and I'm definitely not going to make a change if I'm not their primary care physician. But if I can provide – it's like smoking cessation, and like, you know, even if I was seeing somebody who's a smoker who's not my patient, I'm still going to say where are you at with being ready to quite, you know, quitting smoking is the best thing you can do for your health, et cetera, et cetera. So I might try to fit in a little education there. But if I get a lot of resistance from the patient then I'm not going to push it. Participant 6</p> <p>Again, this is one of those things, it's not my patient, I have to sort of Band-Aid the situation, to plant the seeds and have them follow up in the short term, because there's going to need to be a discussion here about everything, about how to treat alcohol abuse disorder, about how to taper off benzodiazepines, and the signs of, you know, the early refills, etc, combined with alcohol, are a very risky business and inappropriate. And so yeah, there's going to have to be some discussion about that. Participant 8</p> <p>And then to start the conversation of, "Well, maybe this is the medication that – like do we need it or can we do better with something else for it?" And I won't take it away necessarily from them, not at the first visit of interacting with them. Participant 8</p> <p>But something that I would flag as, "Hey, this is something important that maybe you want to discuss</p> |
|--|--|--|-----------------------------------------------------------------------------------------------------------------------------------------------------------------------------------------------------------------------------------------------------------------------------------------------------------------------------------------------------------------------------------------------------------------------------------------------------------------------------------------------------------------------------------------------------------------------------------------------------------------------------------------------------------------------------------------------------------------------------------------------------------------------------------------------------------------------------------------------------------------------------------------------------------------------------------------------------------------------------------------------------------------------------------------------------------------------------------------------------------------------------------------------------------------------------------------------------------------------------------------------------------------------------------------------------------------------------------------------------------------------------------------------------------------------------------------------------------------------------------------------------------------------------------------------------------------------------------------------------------------------------------------------------------------------------------------------------|

1  
2  
3  
4  
5  
6  
7  
8  
9  
10  
11  
12  
13  
14  
15  
16  
17  
18  
19  
20  
21  
22  
23  
24  
25  
26  
27  
28  
29  
30  
31  
32  
33  
34  
35  
36  
37  
38  
39  
40  
41  
42  
43  
44  
45  
46  
47

|                 |  |                                                                                                                                                                                                                                                                                                                                                                       |
|-----------------|--|-----------------------------------------------------------------------------------------------------------------------------------------------------------------------------------------------------------------------------------------------------------------------------------------------------------------------------------------------------------------------|
|                 |  | <p>with your family doctor, or you're welcome to come back and talk to me about it, if you're comfortable doing so." But I would talk to them about the risks and benefits with something like this, with long-term use.<br/>Participant 9</p>                                                                                                                        |
| Strategies Used |  | <p>I try to focus first on non-pharmacological interventions whenever possible. Participant 2</p> <p>I try to avoid medication wherever possible or at least build it into a more comprehensive plan. Participant 4</p> <p>CBTI<br/>Sleep hygiene<br/>Body Scan<br/>Reground how they view sleep<br/>Mindfulness<br/>Sleep doctor<br/>Journalling<br/>Sleep diary</p> |

Confidential
